1       **Mycobacterial infection of precision cut lung slices reveals that the type 1**  
2       **interferon pathway is locally induced by *Mycobacterium bovis* but not *M.***  
3       **tuberculosis in different cattle breeds**

4

5 Aude Remot<sup>1\*</sup>, Florence Carreras<sup>1</sup>, Anthony Coupé<sup>1</sup>, Émilie Doz-Deblauwe<sup>1</sup>,  
6 Boschioli ML<sup>2</sup>, John A. Browne<sup>3</sup>, Quentin Marquant<sup>4</sup>, Delphyne Descamps<sup>4</sup>,  
7 Fabienne Archer<sup>5</sup>, Abrahma Aseffa<sup>6</sup>, Pierre Germon<sup>1</sup>, Stephen V. Gordon<sup>7</sup>, and  
8 Nathalie Winter<sup>1</sup>

9

10 <sup>1</sup> INRAE, Université de Tours, ISP, 37380 Nouzilly, France.

11 <sup>2</sup> Paris-Est University, National Reference Laboratory for Tuberculosis, Animal Health  
12 Laboratory, Anses, Maisons-Alfort, France.

13 <sup>3</sup> UCD School of Agriculture and Food Science, University College Dublin, Belfield,  
14 Dublin 4, Ireland.

15 <sup>4</sup> INRAE, Université Paris-Saclay, UVSQ, VIM, 78350 Jouy-en-Josas, France.

16 <sup>5</sup> Université de Lyon, Université Lyon 1, INRAE, UMR754, Viral Infections and  
17 Comparative Pathology, Université de Lyon, Université Lyon 1, INRAE, Lyon,  
18 France.

19 <sup>6</sup> Armauer Hansen Research Institute, P O Box 1005, Addis Ababa, Ethiopia.

20 <sup>7</sup> UCD School of Veterinary Medicine and UCD Conway Institute, University College  
21 Dublin, Belfield, Dublin 4, Ireland.

22

23

24 \* Correspondence should be addressed to AR [aude.remot@inrae.fr](mailto:aude.remot@inrae.fr)

25

26 **KEY WORDS:** cattle, *Mycobacterium bovis*, *ex vivo*, Precision Cut Lung Slices,  
27 alveolar macrophages, type I interferon

28

29 Number of words: 6434

30 Number of figures: 7

31 Number of supplementary figures: 6

32

33 **ABSTRACT**

34 Tuberculosis exacts a terrible toll on human and animal health. While *Mycobacterium*  
35 *tuberculosis* (Mtb) is restricted to humans, *Mycobacterium bovis* (Mb) is present in a  
36 large range of mammalian hosts. In cattle, bovine TB (bTB) is a notifiable disease  
37 responsible for important economic losses in developed countries and  
38 underestimated zoonosis in the developing world. Early interactions that take place  
39 between mycobacteria and the lung tissue early after aerosol infection govern the  
40 outcome of the disease. In cattle, these early steps remain poorly characterized. The  
41 precision-cut lung slice (PCLS) model preserves the structure and cell diversity of the  
42 lung. We developed this model in cattle in order to study the early lung response to  
43 mycobacterial infection. *In situ* imaging of PCLS infected with fluorescent Mb  
44 revealed bacilli in the alveolar compartment, adjacent or inside alveolar macrophages  
45 (AMPs) and in close contact with pneumocytes. We analyzed the global  
46 transcriptional lung inflammation signature following infection of PCLS with Mb and  
47 Mtb in two French beef breeds: Blonde d'Aquitaine and Charolaise. Whereas lungs  
48 from the Blonde d'Aquitaine produced high levels of mediators of neutrophil and  
49 monocyte recruitment in response to infection, such signatures were not observed in  
50 the Charolaise in our study. In the Blonde d'Aquitaine lung, whereas the inflammatory  
51 response was highly induced by two Mb strains, AF2122 isolated from cattle in the  
52 UK and Mb3601 circulating in France, the response against two Mtb strains, H37Rv  
53 the reference laboratory strain and BTB1558 isolated from zebu in Ethiopia, was very  
54 low. Strikingly, the type I interferon pathway was only induced by Mb but not Mtb  
55 strains indicating that this pathway may be involved in mycobacterial virulence and  
56 host tropism. Hence, the PCLS model in cattle is a valuable tool to deepen our  
57 understanding of early interactions between lung host cells and mycobacteria. It  
58 revealed striking differences between cattle breeds and mycobacterial strains. This  
59 model could help deciphering biomarkers of resistance *versus* susceptibility to bTB in  
60 cattle as such information is still critically needed for bovine genetic selection  
61 programs and would greatly help the global effort to eradicate bTB.

62

63

## 64 INTRODUCTION

65 Bovine tuberculosis (bTB) caused by *Mycobacterium bovis* (Mb) remains one of the  
66 most challenging infections to control in cattle. Because of its zoonotic nature, this  
67 pathogen and associated notifiable disease in cattle are under strict surveillance and  
68 regulation in the European Union. When bTB cases are detected through  
69 surveillance, culling of these reactor cattle is mandatory. In spite of intensive  
70 eradication campaigns, bTB is still prevalent in European cattle [1; 2] and has  
71 significant economical, social and environmental implications. Since 2001, France is  
72 an officially bTB free country a status that was achieved through costly surveillance  
73 programs. However, each year, around one hundred Mb foci of infection are  
74 identified [3] with certain geographical areas showing a constant rise in disease  
75 prevalence since 2004.

76

77 bTB eradication is an unmet priority that faces two major difficulties: the persistence  
78 of undetected infected animals in herds because of lack of diagnostic sensitivity, and  
79 the risk of transmission from infected sources [4]. Moreover, the poor understanding  
80 of bTB pathophysiology in cattle and the lack of correlates of protection are  
81 substantial knowledge gaps that must be resolved so as to better tackle the disease  
82 (DISCONTTOOLS, <https://www.discontools.eu/>).

83

84 Both Mb and *M. tuberculosis* (Mtb) belong to the same genetic complex. Mtb is  
85 responsible for tuberculosis (TB) in humans which displays similar features with bTB.  
86 It is estimated that one third of the global human population are latently infected with  
87 Mtb which kills 1.4 million people each year [5]. Despite the high degree of identity  
88 that Mtb and Mb share both at the genetic level as well as during the infection  
89 process, the two pathogens display distinct tropism and virulence depending on the  
90 host. While Mb is highly virulent and pathogenic for cattle and a range of other  
91 mammals, Mtb is restricted to sustain in humans. Experimental infection of cattle with  
92 the widely used Mtb laboratory strain H37Rv, which was genome sequenced in 1998  
93 [6], shows strong attenuation as compared to Mb [7; 8]. However, natural infection of  
94 cattle with Mtb has been reported, and the strain Mtb BTB1558 was once such case,  
95 isolated from a zebu bull in Ethiopia [9; 10]. In comparison to the original UK Mb  
96 strain AF2122/97, the first genome sequenced Mb isolate [11; 12], the Mtb strain  
97 BTB1558 displayed much lower virulence in European cattle [13].

98

99 The Mb strains that circulate in France today are phylogenetically distant from the UK  
100 Mb reference strain. While AF2122 belongs to the European 1 clonal complex [14],  
101 the European 3 clonal complex is widespread in France, [15]. The Eu3 genetic  
102 cluster is composed of field strains that share the SB0120 spoligotype with the  
103 attenuated *Bacillus Calmette Guérin* vaccine strain [16; 17]. In our study, we used  
104 Mb3601 as the representative strain of this widespread French cluster. Originally,  
105 Mb3601 was isolated from a tracheobronchial lymph node of an infected bovine in a  
106 bTB highly enzoonotic area in France [16]. However, despite widespread circulation  
107 in its origine area, nothing is known today of the pathophysiology of Mb3601  
108 infection.

109 Indeed, greater knowledge is available on Mtb infection process and disease  
110 development both in humans and mouse models as compared to Mb infection in  
111 cattle. With both mycobacteria, the alveolar macrophage (AMP) is the frontline cell  
112 that first presents the first niche for mycobacteria entering the lung, and the role of  
113 the AMP in early-stage infection is well established [8]. Both Mtb and Mb have  
114 established their lifestyle in AMPs: they can escape its bactericidal mechanisms and  
115 multiply within this niche. During the infection process, bacilli disseminate to different  
116 anatomical sites and establish new infection foci both in the lungs and secondary  
117 lymphoid organs [18; 19]. During Mtb infection, lung epithelial cells also play key  
118 roles in the host defense (reviewed in [20; 21; 22]). Type II pneumocytes are infected  
119 by Mtb [23] and produce pro-inflammatory cytokines which augment the AMP innate  
120 resistance mechanisms [24]. The role of Type II pneumocytes during Mb infection in  
121 cattle is not well known. Also, most of the available knowledge on the role of bovine  
122 macrophages (MPs) during Mb infection comes from studies conducted with  
123 monocytes sampled from blood and derived as MPs during *in vitro* culture [25].

124

125 In our study, we wanted to investigate the bovine innate response following Mb or  
126 Mtb infection in a preserved lung environment to allow the resident lung cells to  
127 interact with bacilli and crosstalk. Precision cut lung slices (PCLS) are an  
128 experimental model in which resident lung cell types are preserved and remain alive  
129 for at least one week [26]. The tissue architecture and the interactions between the  
130 different cells are maintained. PCLS have already been validated for the study of  
131 various respiratory pathogens [26; 27; 28]. In chicken PCLS, mononuclear cells are

132 highly motile and actively phagocytic [29]. This model is well designed to study  
133 complex interactions taking place early after the host-pathogen encounter. During Mb  
134 infection in cattle, important differences in production of key proinflammatory  
135 cytokines such as IFN $\gamma$  or TNF $\alpha$  by peripheral blood mononuclear cells are observed  
136 depending on the clinical status of the animal. Interestingly, such differences are  
137 observed at early time points [30] indicating that the innate phase of the host response  
138 is key to the establishment of the pathological outcome of the infection.

139

140 Therefore the PCLS model is ideally suited to investigate early host-pathogen  
141 interactions in the bovine lung during Mb infection, and may help to find clues to the  
142 impact of the innate response on the outcome of infection. This model, that fully  
143 mimicks the early environment of the bacillus entering the lung (as compared to  
144 monocyte-derived MPs) may also aid in understanding the molecular basis of  
145 mycobacterial host preference [31]. To this end, we decided to compare four  
146 mycobacterial strains: two Mtb species, namely the Mtb H37Rv reference strain for  
147 human TB and the cattle-derived Mtb BTB1558, and two Mb species namely Mb  
148 AF2122 as representative of the EU1 clonal complex and Mb3601 as the hallmark  
149 EU3 strain. Since the host genetic background also has profound impact on the  
150 outcome of bTB disease [32], we decided to compare PCLS from two prevalent beef  
151 breeds in France, Charolaise and Blonde d'Aquitaine, and conducted a thorough  
152 characterization of the lung responses to Mb and Mtb during *ex vivo* infection. PCLS  
153 allowed us to decipher important differences in the transcriptomic and cytokine profile  
154 during the innate response to infection, depending both on the breed, i.e. between  
155 Blonde d'Aquitaine and Charolaise cows, and on the mycobacterial species, i.e.  
156 between Mtb and Mb.

157

## 158 **MATERIALS AND METHODS**

### 159 **Animal tissue sampling**

160 Lungs from fifteen Blonde d'Aquitaine and nine Charolaise cows were collected post-  
161 mortem at a commercial abattoir. Animals were between three- and eleven-years-old  
162 and originated from eight different French departments where no recent bTB  
163 outbreak had been notified (Figure S1). No ethical committee approval was  
164 necessary as no animal underwent any experimental procedure. After slaughter by  
165 professionals following the regulatory guidelines from the abattoir, the lungs from

166 each cow were systematically inspected by veterinary services at the abattoir. The  
167 origin of each animal was controlled and its sanitary status was recorded on its  
168 individual passport: animals were certified free of bTB, leucosis, brucellosis, and  
169 infectious bovine rhinotracheitis.

170

### 171 **Bacterial strains and growth conditions**

172 Strains Mb AF2122/97 and Mb MB3601 had previously been isolated from infected  
173 cows in Great Britain and France, respectively [12; 15]. The Mb3601-EGFP  
174 fluorescent strain were derived by electroporation with an integrative plasmid  
175 expressing EGFP and selected with Hygromycin B (50 µg/mL) (Sigma, USA) as  
176 described in previously [33]. Mtb BTB1558 had been previously isolated from a zebu  
177 bull in Ethiopia [13]. Bacteria were grown in Middlebrook 7H9 broth (Difco, UK)  
178 supplemented with 10% BBLTM Middlebrook ADC (Albumin- Dextrose- Catalase,  
179 BD, USA) and 0.05% Tween 80 (Sigma-Aldrich, St Louis, USA). At mid-log phase,  
180 bacteria were harvested, aliquoted, and stored at -80°C. Batches titers were  
181 determined by plating serial dilutions on Middlebrook 7H11 agar supplemented with  
182 10% OADC (Oleic acid- Albumin-Dextrose-Catalase, BD, USA), with 0.5% glycerol or  
183 4.16 g/L sodium pyruvate (Sigma, USA) added for Mtb or Mb strains, respectively.  
184 Plates were incubated at 37°C for 3-4 weeks (H37Rv, BTB558 and AF2122) and up  
185 to 6 weeks for Mb3601 before CFUs numeration. Inocula were prepared from one  
186 frozen aliquot (titer determined by CFU numeration) that was thawed in 7H9 medium  
187 without glycerol and incubated overnight at 37°C. After centrifugation 10 min at 3000  
188 x g, concentration was adjusted to 10<sup>6</sup> cfu/mL in RPMI medium.

189

### 190 **Obtention and infection of Precision-Cut Lung Slices (PCLS)**

191 PCLS were obtained from fresh lungs using a tissue slicer MD 6000 (Alabama  
192 Research and Development). For each animal, the right accessory lobe was filled via  
193 the bronchus with RPMI containing 1.5% low melting point (LMP) agarose  
194 (Invitrogen) warmed at 39°C. After 20 min at 4°C, solidified lung tissue was cut in 1.5  
195 cm slices with a scalpel. A 0.8 mm diameter punch was used to obtain biopsies that  
196 were placed in the microtome device of the Krumdieck apparatus, filled with cold  
197 PBS, and 100 µM thick PCLS were cut. One PCLS was introduced in each well of a  
198 P24 well plate (Nunc), one mL of RPMI 1640 (Gibco) supplemented with 10% heat  
199 inactivated Fetal Calf Serum (FCS, Gibco), 2 mM L-Glutamine (Gibco) and PANTA™



200 Antibiotic Mixture (polymyxin B, amphotericin B, nalidixic acid, trimethoprim and  
201 azlocillin; Becton Dickinson) was added to the well and the plate was incubated at  
202 37°C with 5% CO<sub>2</sub>. Medium was changed every 30 min during the first 2 h to remove  
203 all traces of LMP agarose. Twenty four hours later, after the last medium change, the  
204 ciliary activity was observed under a microscope to ensure tissue viability.

205

206 PCLS were infected two days with 10<sup>5</sup> CFU of Mb or Mtb strains. As indicated, PCLS  
207 were either fixed in formalin for imaging or lysed with a Precellys in lysing matrix D  
208 tubes in 800 µL Tri-reagent for RNA extraction. The bacillary load of each strain  
209 present in the PCLS was compared after transfer of PCLS to a new plate 1 day after  
210 infection (dpi), two washes in 1 mL of PBS, and homogenization in 1 mL of PBS in  
211 lysing matrix D tubes (MP Biomedicals) with a Precellys (Ozyme). To determine  
212 CFUs, serial dilutions were plated as described above.

213

#### 214 **Alveolar macrophages (AMPs)**

215 To harvest AMPs from Blonde d'Aquitaine cows, broncho-alveolar lavages (BAL)  
216 were performed on the left basilar lobe of the lung at a local abattoir after culling of  
217 the animal. The lobe was filled with 2 x 500mL of cold PBS containing 2 mM EDTA  
218 (Sigma-Aldrich). After massage, the BAL was collected and transported at 4°C to the  
219 laboratory. BAL was filtered with a 100 µm cell strainer (Falcon) and centrifuged for  
220 10 min at 300 x g. Cells were washed in RPMI medium supplemented with 10% heat  
221 inactivated fetal calf serum (Gibco), 2 mM L-Glutamine (Gibco) and PANTA™  
222 Antibiotic Mixture. 10<sup>7</sup> BAL cells per mL were suspended in 90% FCS and 10%  
223 DMSO (Sigma-Aldrich) and cryopreserved in liquid nitrogen. One day before  
224 infection, BAL cells were thawed at 37°C, washed in complete RPMI medium, and  
225 transferred to a 75 cm<sup>2</sup> culture flask with a ventilated cap. After 2 h at 37°C 5% CO<sub>2</sub>,  
226 non adherent cells were removed, and adherent AMPs were incubated 2 x 10min at  
227 4°C with 10 mL of cold PBS to detach and enumerate them in a Malassez chamber.  
228 5 x 10<sup>5</sup> AMPs /well were distributed in a P24 well-plate and incubated overnight at  
229 37°C 5% CO<sub>2</sub>. Medium was changed once and AMPs were infected with Mb3601 or  
230 Mtb H37Rv at a MOI of 1. At 6 h and 24 h pi, supernatants were filtered through a 0.2  
231 µm filter and cells were lysed in 800 µL of Tri-reagent for RNA extraction. MOI was  
232 checked by CFU determination 24 h after infection.

233

## 234 **Cell supernatant collection and lactate deshydrogenase (LDH) assay**

235 In order to evaluate cytotoxicity, supernatants from infected PCLS or AMPs were  
236 passed through a 0.2 µm filter at indicated time points and cells were lysed in 1 mL of  
237 lysis buffer (5mM EDTA, 150 mM NaCl, 50 mM Tris-HCl, Triton 1%, pH 7.4),  
238 containing anti-proteases (Roche), in lysing matrix D tube, with a Precellys  
239 apparatus. Homogenates were clarified by centrifugation 10 min at 10000 x g, filtered  
240 through 0.2 µm and collected on microplates. Cytotoxicity of infection in PCLS was  
241 assessed using the “Non-Radioactive Cytotoxicity Assay” kit (Promega) according to  
242 the manufacturer’s instructions. The cytotoxicity was calculated as: cytotoxicity (%) =  
243  $(OD_{490} \text{ of LDH in the supernatant}) / (OD_{490} \text{ of LDH in the supernatant} + OD_{490} \text{ of LDH}$   
244  $\text{in the PCLS homogenates}) \times 100$ .

245

## 246 **Immunohistochemistry on PCLS**

247 Infected PCLS were fixed 24 h at 4°C with 4% of formalin, then transferred to a 48-  
248 wells culture plate in PBS. All steps described below were done under gentle  
249 agitation at room temperature (RT). PCLS were incubated 2 h with 100 µL of PBS,  
250 0.25% Triton X-100, 10% horse serum for permeabilization and saturation (saturation  
251 buffer). They were incubated overnight at 4°C with primary Ab (anti-bovine MHCII  
252 clone MCA5655 from BioRad, anti-bovine pancytokeratine clone BM4068 from Acris)  
253 diluted in saturation buffer. PCLS were washed 4 times with 300 µL of PBS (2x 5  
254 min, then 2x 10 min), then incubated 3 h with fluorescent-conjugated secondary  
255 antibodies diluted in saturation buffer (Goat anti-mouse IgG1-APC and Goat anti-  
256 mouse IgG2a A555 from Invitrogen). PCLS were washed 4 times with 300 µL of PBS  
257 (2x 5 min, then 2 x 10 min), and transferred on coverslips which were mounted with  
258 Fluoromount-G™ Mounting Medium, containing DAPI (Invitrogen) and sealed with  
259 transparent nail polish. Z-stack imaging was performed at x 63 enlargement with a  
260 confocal microscope (LEICA) and analyzed with LAS software.

261

## 262 **Quantification of cytokines and chemokines released by PCLS and AMPs**

263 Cytokine and chemokine levels produced by PCLS after 2 dpi were assessed in a  
264 Multiplex assay in supernatants (dilution 1:2) with MILLIPLEX® Bovine  
265 Cytokine/Chemokine Panel 1 (BCYT1-33K-PX15, Merck) according to the  
266 manufacturer’s instructions. IFN $\gamma$ , IL-1 $\alpha$ , IL-1 $\beta$ , IL-4, IL-6, IL-8 (CXCL8), IL-10, IL-  
267 17A, IL-36RA (IL-1F5), IP-10 (CXCL10), MCP-1 (CCL2), MIP-1 $\alpha$  (CCL3), MIP-1 $\beta$



268 (CCL4), TNF $\alpha$ , & VEGF-A were measured. Data were acquired using a MagPix  
269 instrument (Luminex) and analyzed with Bio-Plex Manager software (Bio-Rad). IL-8  
270 was out of range in the Multiplex, so we performed a sandwich ELISA with the  
271 following references: Goat anti Bovine Interleukin-8 Ab AHP2817, Recombinant  
272 Bovine Interleukin-8 PBP039 and Goat anti Bovine Interleukin-8 Ab conjugated to  
273 biotin AHP2817B (all from Bio-Rad, protocol according to the manufacturer's  
274 intructions).

275

### 276 **RNA extraction and gene expression analysis**

277 Total RNA from two pooled PCLS were extracted using a MagMAX™-96 Total RNA  
278 isolation kit (ThermoFisher). For AMPs we used the Nucleospin RNA isolation kit  
279 (Macherey Nagel). After DNase treatment (ThermoFisher or Macherey Nagel)  
280 mRNAs were reverse transcribed with iScript™ Reverse Transcriptase mix (Biorad)  
281 according to the manufacturer's instructions. Primers (Eurogenetec; Supplementary  
282 Table S1) were validated using a serially diluted pool of cDNA mix obtained from  
283 bovine lung, lymph nodes, blood and bone marrow, with a LightCycler® 480 Real-  
284 Time PCR System (Roche). Gene expression was then assessed with the  
285 BioMark HD (Fluidigm) in 96 x 96 well IFC plate, according to the manufacturer's  
286 instructions. The annealing temperature was 60°C. Data were analyzed with Fluidigm  
287 RealTime PCR software to determine the cycle threshold (Ct) values. Messenger  
288 RNA (mRNA) expression was normalized to the mean expression of three  
289 housekeeping genes (*PPIA*, *GAPDH*, *ACTB*) to obtain the  $\Delta$ Ct value. For each  
290 animal, values from infected PCLS were normalized to the uninfected PCLS gene  
291 expression ( $\Delta\Delta$ Ct value, and Relative Quantity =  $2^{-\Delta\Delta Ct}$ ). Principal Component  
292 Analysis (PCA) were performed using  $\Delta\Delta$ Ct values in R studio (Version 1.1.456 ©  
293 2009-2018 RStudio, PBC), using the FactoMineR packages (version R 3.5.3).

294

### 295 **Statistical analysis**

296 Individual data, and the median and interquartile range are presented in the figures,  
297 except for Figure 2 where the mean and standard deviation are presented. Statistical  
298 analyses were performed with Prism 6.0 software (GraphPad). Analyzes were  
299 performed on data from two to six independent experiments, with 2-way ANOVA or  
300 Wilcoxon non-parametric tests for paired samples used. Represented p-values were:  
301 \* $p < 0.05$ ; \*\* $p < 0.01$ ; \*\*\* $p < 0.001$  .

302

## 303 **SUPPLEMENTARY INFORMATION**

304 The Supplementary Material for this article can be found online.

305

## 306 **RESULTS**

307

### 308 ***Ex vivo* infection with mycobacteria of live bovine lung tissue in PCLS allows** 309 **bacilli uptake by AMPs and their recruitment to alveoli.**

310 Early events of bTB pathophysiology in the bovine lung remain poorly defined due to  
311 the complexity of biocontained experimental infection in large animals. Since PCLS  
312 have been used to study viral respiratory infections in the bovine [26], we decided to  
313 use this model to assess early events taking place following entry of Mb into the lung.  
314 We infected bovine PCLS obtained *ex vivo* with the four mycobacterial strains: Mb  
315 AF2122, Mb3601, Mtb H37Rv or BTB1558.

316

317 We first monitored tissue cytotoxicity at 1 and 2 days post infection (dpi) using a  
318 lactate dehydrogenase (LDH) release assay. The mean percentage of cytotoxicity  
319 remained below 10% and no difference was observed between infected and non-  
320 infected PCLS (Fig. 1A). The ciliary activity from the PCLS bronchial cells monitored  
321 every day under a light microscope remained vigorous and stable after infection  
322 (data not shown). We calibrated our model and inocula to use  $10^5$  CFUs for each of  
323 the four different strains. We analyzed CFUs still present in PCLS 24 h later and  
324 observed an equivalent 1 log decrease for all strains (Fig. 1B). This indicated  
325 equivalent infection by all strains, allowing them to be directly compared. Therefore,  
326 with similar bacterial load and excellent tissue viability in all experimental conditions,  
327 we validated PCLS as a model to study early events taking place in the bovine lung  
328 after infection with mycobacteria.

329

330 In order to visualize interactions taking place between bacilli and lung cells, we  
331 infected PCLS with a fluorescent version of the Mb3601 strain, and at 1 and 2 dpi we  
332 analyzed the cells by *in situ* immunohistochemistry. The lung structure was visualized  
333 by DAPI and pancytokeratine staining and we used confocal microscopy to image  
334 10-15 $\mu$ m sections and localize Mb3601-EGFP (Fig. 2A). We observed Mb in  $27 \pm 3$   
335 % of PCLS alveoli (Fig. 2A and 2B) and almost always in close contact with large

336 MHC-II positive AMPs. Bacilli were localized outside AMPs in  $76 \pm 2$  % observations  
337 and resided intracellularly in AMPs in  $24 \pm 2$  % (Fig. 2A and 2C and Supplementary  
338 video). Interestingly, the number of AMPs per alveoli differed upon bacilli presence or  
339 absence (Fig. 2D). In uninfected PCLS, lung alveoli generally contained one AMP  
340 (data not shown). However, in Mb infected PCLS, we either observed no AMPs in  $66$   
341  $\pm 2$  % of alveoli or one AMP in  $33 \pm 2$  % of alveoli in the absence of any Mb. On the  
342 contrary, the number of AMPs significantly increased in alveoli where at least one Mb  
343 was observed (Fig. 2D,  $p < 0.001$ ). The number of AMPs varied among infected  
344 alveoli with  $24 \pm 9$  % containing one AMP,  $52 \pm 6$  % containing 2 or 3 AMPs and  $9 \pm 4$   
345 % containing more than 4 AMPs. Such observations indicated that during the 2 days  
346 of infection, AMPs were recruited from one alveoli to the other in response to signals  
347 linked to Mb infection. In conclusion, even though Mb infection was performed *ex*  
348 *vivo*, bacilli were observed in the alveoli, close or inside their target host cell i.e. the  
349 AMP. Moreover, the PCLS model was physiological enough to allow AMPs to crawl  
350 in response to signals linked to bacilli entry.

351

### 352 **The lung response to mycobacterial infection vastly differs between Blonde** 353 **d'Aquitaine and Charolaise cows.**

354 Two bovine beef breeds are widely used in France: Blonde d'Aquitaine and  
355 Charolaise. We decided to compare how these two breeds respond to mycobacterial  
356 infection, using our PCLS system. We measured 15 cytokines and chemokines  
357 secreted by the lung tissue at 2 dpi with the four mycobacterial strains and performed  
358 a principal component analysis (PCA). As depicted in Fig. 3A, PCA revealed  
359 important differences in the immune response of the lung tissue between the two  
360 breeds. Group samples clearly plotted apart and their ellipses showed either a small  
361 overlay (AF2122 and Mb360A) or no overlay at all (H37Rv). Results for the BTB1558  
362 group showed less clustering of samples due to higher individual variations. We then  
363 extracted total RNA from PCLS after 1 or 2 dpi and analyzed the expression of 96  
364 genes related to innate immunity and inflammation (see full list in supplementary  
365 Table 1). RT-qPCR data were normalized and expressed as fold change compared  
366 to uninfected PCLS control for each cow. Gene expression was higher 2 days after  
367 infection as compared to 1 (data not shown). We therefore decided to focus our  
368 analysis on this 2 dpi time point. Remarkably, the transcriptomic signature induced by  
369 infection was very low for the Charolaise breed, whichever mycobacterial strain was

370 used, which explains the clustering of Charolaise samples (Fig. 3B). Increasing the  
371 inoculum in the Charolaise PCLS up to  $5 \times 10^6$  CFU did not induce gene  
372 expression (Fig. S2). The response of the lung tissue to mycobacterial infection in  
373 Blonde d'Aquitaine was very different as compared to Charolaise, as revealed by a  
374 PCA (Fig. 3B). Whereas in PCLS from Charolaise gene expression from infected and  
375 non-infected controls clustered, in PCLS from Blonde d'Aquitaine, gene expression  
376 levels were significantly more dispersed after infection as compared to controls (Fig  
377 3B). We compared individual gene expression between the two breeds for a number  
378 of genes. For instance, both the *CXCL2* chemokine, and the mycobacteria receptor  
379 syndexin 4 *SDC4*, were significantly upregulated after PCLS infection with AF2122,  
380 Mb3601 or H37Rv in Blonde d'Aquitaine, but not in Charolaise (Fig. 3C). Altogether,  
381 our data revealed important differences in the early lung response to mycobacterial  
382 infection, depending on the breed of the animals, that could be measured both at the  
383 gene expression and protein production level in the PCLS system.

384

385 **The overall inflammation signature in the lung tissue is triggered more**  
386 **efficiently by *M. bovis* than *M. tuberculosis***

387 We then focused our analysis on Blonde d'Aquitaine to determine how the lung  
388 tissue responded to different mycobacterial strains. We analyzed 15 cytokines and  
389 chemokines produced in the PCLS supernatants 2 days following infection. No IL-4  
390 was detected and production of TNF $\alpha$ , IL-36RA, IL-10, VEGFA or MCP-1 was not  
391 different between infected PCLS and controls (Figure S3A). We observed that *ex*  
392 *vivo* infection of PCLS with mycobacteria triggered an inflammatory response that  
393 contrasted between the strains (Fig. 4A). At the protein level, the Mtb strain BTB1558  
394 induced the most heterogenous response and, due to high individual variation,  
395 differences in chemokine/cytokine production between infected PCLS and controls  
396 only reached statistical significance for MIP-1a (CCL3) and IL-8 (Fig. 4A). These two  
397 inflammatory mediators were also strongly induced by all strains. IL-17A, IL-1 $\beta$  and  
398 IFN $\gamma$  were efficiently induced by mycobacterial infection and no significant difference  
399 was observed between Mtb and Mb. By contrast, IL-6 and IL-1 $\alpha$  were significantly  
400 induced after Mb but not Mtb infection and IL-8 production was also significantly  
401 higher after Mb than Mtb infection (Fig 4A). The only strain able to induce significant  
402 production of MIP-1b was Mb3601. We then analyzed the inflammatory  
403 transcriptomic signature using a panel of 17 genes involved in

404 monocyte/macrophage and neutrophil recruitment (Fig. 4B). A number of these  
405 genes was significantly upregulated upon PCLS infection even though significant  
406 differences were not always reached due to inter-individual variation. Remarkably,  
407 Mb3601 induced the strongest inflammatory response, with 5 out of 17 genes  
408 significantly upregulated as compared to non-infected controls. Focusing on  
409 chemokines involved in neutrophil recruitment, we observed that *CXCL2* expression  
410 was induced by all strains -except BTB1558- whereas *CXCL1*, *CXCL5* and *CXCL8*  
411 were only upregulated by Mb3601 (Fig. 4B and 4C). *IL-6* expression was also high  
412 after Mb3601 infection. Therefore, *ex vivo* infection of PCLS efficiently triggered  
413 signals involved in monocyte and neutrophil recruitment. Infection by Mb strains, and  
414 more specifically the Mb3601 strain circulating in France, triggered inflammation in  
415 the bovine lung more efficiently than Mtb.

416

#### 417 **The type I interferon pathway is induced in the bovine lung by infection with *M.*** 418 ***bovis* but not *M. tuberculosis***

419 Because in humans and mouse models, susceptibility to mycobacterial infection and  
420 disease progression is driven by type I IFN [34; 35; 36], we decided to compare  
421 induction of this pathway by Mtb and Mb strains in bovine lung tissue. We measured  
422 expression of different genes involved in the type I IFN pathway in Blonde  
423 d'Aquitaine PCLS infected by the four mycobacterial strains (Fig. 5). Gene  
424 expression of both *IFN $\beta$*  and the *IFNAR1* receptor were significantly increased after  
425 Mb but not Mtb infection (Fig. 5A and 5C). Similarly, the major IFN stimulated genes  
426 (ISG) *MX1*, *OAS1*, *ISG15* and *CXCL10*, were induced only after Mb infection (Fig. 5A  
427 and 5C) and this difference was also detected at the protein level for *CXCL10* (Fig.  
428 5A and 5B). Therefore we observed induction of a number of genes of the type I IFN  
429 pathway, recapitulated in Fig 5D, after infection with Mb but not Mtb strains.  
430 Strikingly, strain Mb3601 was the highest inducer of this pathway in the lung from  
431 Blonde d'Aquitaine cows.

432

433 Because AMPs are the most prominent host cell interacting with Mb [8], which we  
434 also observed in PCLS (Fig. 2), we next decided to decipher if AMPs contributed to  
435 induction of the type I IFN pathway after Mb3601 or H37Rv infection. One day after  
436 infection of AMPs with these two strains similar bacterial levels were recovered (data  
437 not shown). At 6 hours post infection no cell cytotoxicity was observed and we

438 analyzed expression of genes from the type 1 IFN pathway at this early time point.  
439 While we did not observe differences in *IFNAR1*, *IRF3*, *STAT1* nor *ISG15* expression  
440 induced by the two strains (Fig. 6A), *IFN $\beta$* , *LPG2*, *RIG1* and *OAS1* were significantly  
441 induced after infection with Mb3601 but not H37Rv (Fig. 6C and 6D). Regarding  
442 *MX1*, the same trend was observed although statistical significance was not reached  
443 (Fig. 6D,  $p=0.07$ ).

444  
445 Interestingly, while *CXCL10* was detected both at the mRNA and protein level in  
446 PCLS infected with Mb (Fig. 5), we did not detect expression of this gene by AMPs in  
447 our analysis. Altogether these results demonstrate that AMPs globally contribute to  
448 the type I IFN pathway in the lung after Mb infection, although other cells present in  
449 PCLS may also specifically induce some genes, such as *CXCL10* or *IRF7* for  
450 example (Fig. 5C and 6A).

451

## 452 **DISCUSSION**

453 The lung is the main organ targeted by Mb infection in cattle [37] and early  
454 interactions between the different lung cell types and the bacillus that govern the  
455 pathophysiology of the disease need to be better understood. In this study we used  
456 PCLS for the first time to monitor the early bovine lung response to Mb infection, and  
457 validated this model as a means to measure the local innate response at the protein  
458 and mRNA level. A main advantage of PCLS is conservation of the complex lung  
459 tissue both in structure and diversity of cell types. After infection with mycobacteria,  
460 ciliary activity of bronchial cells was maintained. AMP main function is to patrol the  
461 lung, crawling in and between alveoli, they sensed, chemotaxed, and phagocytosed  
462 debris or inhaled bacterial [38]. We observed increased numbers of AMPs in alveoli  
463 where Mb was present, indicating AMP mobility inside the tissue. In chicken, PCLS  
464 allowed observation of MPs movement and phagocytosis [29]. The AMP is well  
465 established as the main host cell for *Mtb* infection in humans [39] and Mb infection in  
466 cattle [40]. Accordingly, in PCLS we observed Mb inside AMPs in 20% of infected  
467 alveoli. We sometimes observed several bacilli inside one AMP. Although Mb is able  
468 to replicate inside this hostile cell, it is difficult to know if this observation was due to  
469 bacillary multiplication or phagocytosis of several bacilli. This issue would need live  
470 imaging of PCLS to follow the fate of fluorescent Mb, an approach which remains  
471 challenging under BSL3 conditions.



472

473 In uninfected PCLS, we observed generally one AMP for 2-3 alveoli (Fig S4, in good  
474 correlation with Neupane et al., [38]). After Mb infection, we observed several AMPs  
475 inside the same alveolus in 50% cases. Moreover, when the alveoli contained more  
476 than four AMPs, they were in closed contact. Multinucleated giant cells are formed by  
477 fusion of several MPs and are a hallmark of TB pathophysiology. It has recently been  
478 demonstrated that after infection of human or bovine blood derived MPs by Mb or  
479 Mtb, only Mb was able to induce the formation of multinucleated cells [41]. Although  
480 2 dpi we did not observe formation of such cells in PCLS, it would be interesting to  
481 analyze if such events could be detected after longer infection periods.

482

483 One other advantage of our model is the preserved diversity of lung cell composition.  
484 PCLS contain type I and type II pneumocytes, endothelial cells, and bronchial cells  
485 (Fig S4) and also produce key molecules like surfactant which has an established  
486 role in Mtb uptake [42]. Mtb is also capable of invading type II alveolar epithelial cells  
487 [23] that play important roles in host defense [20; 21; 22]. In our study, we did not  
488 observe intraepithelial Mb, but specific labelling of bovine epithelial cells would be  
489 required to investigate interactions between bovine lung pneumocytes and Mb in  
490 more detail. However, as we observed that infected AMPs were in close contact with  
491 epithelial cells in PCLS, this model will allow a more refined analysis of the crosstalk  
492 between AMPs and pneumocytes during Mb infection [24].

493

494 One limitation of the PCLS model is the lack of recruitment of immune cells from  
495 circulating blood. During mycobacterial infection, in response to local signals, a  
496 variety of immune cells are recruited to the infection site to form the mature  
497 granuloma that constrains bacillary multiplication. How this response is orchestrated at  
498 the level of the lung tissue in cattle remains poorly established. Neutrophils, together  
499 with other innate cells such as macrophages,  $\gamma\delta$ -T lymphocytes and natural killer  
500 cells, were recently identified as key immune cells in early containment of infection  
501 [43] and development of early lesions [44]. Moreover, humans regularly exposed to  
502 Mtb, or cattle exposed to Mb, do not always develop signs of infection, i.e. remain  
503 negative in IFN $\gamma$ -release assay or skin testing. In humans, such resistance to  
504 infection through successful elimination of bacilli could be mediated by neutrophils [45].  
505 Similarly, in cattle experimentally infected with Mb, some contact animals resist

506 infection while others develop lesions due to productive infection [46]. It is possible  
507 that neutrophils could also play an important role in early elimination of Mb in cattle  
508 [43]. Immune signals involved in early recruitment of neutrophils to the lung after  
509 entry of Mb need to be better understood in cattle. It is known that epithelial cells  
510 secrete, among other cytokines and chemokines, MIP1 and CXCL8 that attract MPs  
511 and neutrophils to the site of infection. Interestingly we measured important  
512 differences in production of such mediators by PCLS in response to different strains  
513 of mycobacteria that could be linked to variable virulence. Although one cattle Type II  
514 pneumocyte cell line has been described [47], such transformed cells are less  
515 physiologically relevant than primary cells. Thus, PCLS could help understanding the  
516 early orchestration of the local inflammatory response in the lung in response to  
517 mycobacterial infection.

518

519 Resistance to bTB is linked to the host genetics. Zebu breeds (*Bos indicus*) have  
520 been reported to be more resistant than *Bos taurus* derived breeds to bTB disease  
521 [48]. Our results with PCLS, as a physiological model of the early lung response to  
522 infection, demonstrated striking differences between Blonde d'Aquitaine and  
523 Charolaise emphasizing the importance of the host genetics in response to Mb. It is  
524 not known whether the stronger inflammatory response of the Blonde d'Aquitaine  
525 tissue is associated with greater sensitivity or resistance to Mb infection. While robust  
526 immunological responses are associated with increased pathology at the level of the  
527 animal [30], at the cellular level, blood derived MPs from animals with greater  
528 resistance to bTB (and that kill BCG more efficiently than cells from susceptible  
529 animals) produce higher levels of the pro-inflammatory mediators iNOS, IL-1 $\beta$ ,  
530 TNF $\alpha$ , MIP1 and MIP3 [49]. Although genetic selection of cattle would greatly  
531 complement bTB management and surveillance programs to control and ultimately  
532 eradicate the disease, especially in countries with the highest burden [50; 51],  
533 biomarkers to evaluate resistance or susceptibility of cattle to Mb infection are  
534 critically missing. Some genomic regions and candidate genes have been identified  
535 in Holstein Friesian cows, the most common dairy breed [52] and not surprisingly,  
536 these candidates are often involved in inflammation. A genomic region on  
537 chromosome 23, containing genes involved in the TNF $\alpha$ /NF $\kappa$ -B signalling pathway,  
538 was strongly associated with host susceptibility to bTB infection [53]. However, large  
539 within-breed analyses of Charolaise, Limousine, and Holstein-Friesian cattle

540 identified 38 SNPs and 64 QTL regions associated with bTB susceptibility to infection  
541 [54]. The genotyping of 1966 Holstein-Friesian dairy cows that were positive by skin  
542 test and either did, or did not, harbour visible bTB lesions, together with their skin-test  
543 negative matched controls led to the conclusion that these variable phenotypes  
544 following Mb exposure were governed by distinct and overlapping genetic variants  
545 [55]. Thus, variation in the pathology of Mb seems to be controlled by a large number  
546 of loci and a combination of small effects. Similar conclusions were drawn from  
547 genetic studies of human tuberculosis [56]. In areas where Mb is highly prevalent,  
548 recurrent exposure to Mb may also imprint the bovine genome, and epigenetics could  
549 also contribute to the immune response in certain breeds. In France, the Nouvelle  
550 Aquitaine region accounted for 80% of Mb outbreaks last year. Interestingly, Blonde  
551 d'Aquitaine breed is very abundant in this area (Fig. 7). Together with another very  
552 abundant beef breed in this region, Limousine, they contribute to most bTB outbreaks  
553 in Nouvelle Aquitaine (bovine tuberculosis national reference laboratory  
554 communication). Future comparisons with Limousine would be interesting. In our  
555 study, Blonde d'Aquitaine or Charolaise cows were sampled from eight different  
556 French departments, none with recurrent Mb outbreaks, rendering previous exposure  
557 to Mb unlikely. Moreover breeding management was similar for the two breeds, as far  
558 as we could ascertain, suggesting that exposure to environment and possible wildlife  
559 sources would be comparable. We nevertheless observed striking differences in the  
560 early lung response to Mb infection between these two breeds, pointing to possible  
561 control of Mb infection at the genetic or epigenetic level. Whether one cattle breed is  
562 more susceptible to bTB than others remains an open question that deserves future  
563 studies, with more consequent animal sampling to better sustain our observations.  
564 We furthermore believe that the PCLS model could greatly contribute to unravelling  
565 the role of tissue-level protective responses that would in turn reveal important  
566 biomarkers.

567

568 In addition to the cattle breed, our study pointed towards differences in the host  
569 response to distinct mycobacterial strains. Mb strains were better inducers of a lung  
570 immune response than Mtb in cattle, in agreement with previous work showing that  
571 Mtb H37Rv was attenuated *in vivo* in cattle as compared to Mb AF2122 [13]. *In vitro*  
572 studies with bovine AMPs infected with AF2122 or H37Rv revealed differences in the  
573 innate cytokine profiles: CCL4, IL-1 $\beta$ , IL-6 and TNF $\alpha$  levels were more elevated in

574 response to AF2122 than H37Rv [8], in agreement with our data. Interestingly,  
575 Mb3601, a representative strain of a highly successful genetic cluster that circulates  
576 both in cattle and wildlife in France [16] induced an inflammatory signature in the lung  
577 more efficiently than Mb AF2122. Whether this correlates with differences in Mb  
578 virulence in cattle or other mammals remains to be shown; but if this were the case,  
579 the PCLS model would be a practical tool to study and compare the virulence of Mb  
580 field strains, as compared to *in vivo* experimental infection of cattle. Contrary to Mtb  
581 which is mostly restricted to humans, Mb is adapted to sustain across a large host  
582 range through repeated cycles of infection and transmission [57; 58]. This  
583 remarkable trait is due to pathogen molecular genetic changes [59] that allow  
584 adapted bacilli to manipulate the host immune response to establish infection and  
585 disease, and ultimately transmit infection to new, susceptible hosts [60; 61]. We  
586 observed weaker inflammation in the bovine lung after infection with Mtb as  
587 compared to Mb and it will be interesting to compare the ability of Mtb and Mb to  
588 induce inflammation in human PCLS obtained post surgery. This latter comparative  
589 analysis could give clues on the links between lung innate inflammatory responses  
590 and host-adaptation during TB.

591

592 Our most striking observation was the Mb-restricted induction of the type I IFN  
593 pathway in the bovine lung. This is in agreement with previous studies in bovine  
594 AMPs where cytosolic DNA-sensing pathways, in particular RIG-I, were activated  
595 after 48h of infection by Mb AF2122 but not Mtb H37Rv [31]. In agreement with our  
596 data these authors also demonstrated induction of the RIG-I signaling pathway by Mb  
597 in AMPs [62]. Therefore, AMPs contribute to type I IFN signalling in the lung.  
598 However, we also noticed differences between PCLS and AMPs in induction of the  
599 IFN signature by Mb: for example, CXCL10 was detected in PCLS but not in AMPs in  
600 our study, which may be due to the time point used [63]. However, it is also possible  
601 that other cells involved in crosstalk with AMPs contributed to CXCL10 production in  
602 response to Mb infection. Since CXCL10 has been proposed as a diagnostic  
603 biomarker of Mb infection in cattle [64], it will be interesting to better understand how  
604 this key mediator is regulated. Type I interferon favors Mb survival and its induction  
605 may be a good manipulation strategy for maintenance of infection. This manipulation  
606 mechanism, deciphered *in vitro* in murine bone marrow monocyte-derived MPs,  
607 involves triggering of autophagy by cytosolic Mb DNA in turn inducing IFN $\beta$

608 production. Autophagy antagonizes inflammasome activation to the benefit of Mb  
609 survival [65; 66]. In C57BL/6 mice treated with IFNAR1 blocking Ab and infected with  
610 Mb, the recruitment of neutrophils was reduced but the pro-inflammatory profile of  
611 MPs was increased, leading to reduced bacillary burden [67]. No impact on T-cells  
612 was observed in this *in vivo* model, revealing a role of type I IFN signaling during the  
613 innate phase of the host response to infection. Therefore, Mb exploits type I IFN  
614 signaling in many ways and this pathway seems an important avenue to better  
615 understand Mb virulence. The PCLS model will greatly help to better dissect out this  
616 pathway in the lung during bTB. This could lead to new biomarkers to help genomic  
617 selection programs for cattle that are more resistant to bTB, as well as new  
618 immunostimulation strategies counteracting the type I IFN pathway. This new  
619 knowledge will ultimately improve bTB control, a goal which is so greatly needed at  
620 the global level [68].

621

## 622 **ACKNOWLEDGMENTS**

623 We thank the staff from the Abattoir du Perche Vendômois for valuable access to and  
624 assistance for bovine post-mortem sampling. We thank Dr. Bojan Stokjovic for his  
625 assistance for some PCLS experiment. We are very grateful to Gillian P. McHugo for  
626 the drawing of the type I interferon pathway with Ingenuity Pathway analysis.

627 This work was supported by the Veterinary Biocontained research facility Network  
628 (VETBIONET), the ANR EpiLungCell (grant ANR-17-CE20-0018) and  
629 FEDER/Region Centre Val de Loire ANIMALT grant (FEDER convention number  
630 EX007516, Region Centre convention number 2019-00134936, research program  
631 number AE-2019-1850). Mobilities between France and Ireland were supported by the  
632 “ONE-TB” project (PHC Ulysses, funded by Campus France and the Irish Research  
633 Council), and the Fédération de Recherche en Infectiologie du Centre Val de Loire  
634 (FéRI).

635

## 636 **AUTHOR CONTRIBUTIONS**

637 AR designed and did most of the experiments, obtained funding, analyzed data,  
638 prepared all figures and wrote the manuscript. NW obtained funding, supervised all  
639 aspects of the work, critically analyzed the data and wrote the manuscript. FC  
640 performed experiments and prepared the inocula for experimental infections under  
641 BSL3 conditions. AC cultured AMPs, performed ELISA and q-RT-PCR. EDD helped

642 for PCLS experiments and revised the manuscript. MLB provided Mb3601 strain and  
643 revised the manuscript. AA provided strain Mtb BTB1558. JAB improved the RNA  
644 extraction protocol. DD and QM performed multiplex experiments. FA provided Ab  
645 and critically reviewed imaging data. PG helped with transcriptomic analysis and  
646 revised the manuscript. SVG obtained funding, designed experiments and revised  
647 the manuscript. All authors read and approved the manuscript before publication.

648

#### 649 **Competing Interests Statement**

650 The authors declare that the research was conducted in the absence of any  
651 commercial or financial relationships that could be construed as a potential conflict of  
652 interest

653

#### 654 **Figure Legends**

655 **Figure 1: PCLS infection with four different Mb or Mtb strains does not induce**  
656 **lung tissue cytotoxicity and equivalent numbers of bacilli are recovered 24 h**  
657 **post-infection**

658 **(A)** PCLS prepared from Blonde d'Aquitaine lungs post-mortem were infected with  
659  $10^5$  cfu of two Mb strains (AF2122 or Mb3601) or two Mtb strains (H37Rv or  
660 BTB1558). After 1 and 2 days post infection, PCLS supernatants were harvested and  
661 tissue was homogenized. Lactate dehydrogenase (LDH) was measured in both  
662 compartments using the "Non-Radioactive Cytotoxicity Assay" kit. Cytotoxicity was  
663 determined as (%) =  $(\text{O.D.490nm LDH in supernatant}) / (\text{O.D.490nm LDH in}$   
664  $\text{supernatant} + \text{O.D.490nm LDH in PCLS homogenates}) \times 100$ . Individual data and the  
665 median and interquartile range in each group are presented (n=6 animals, from 6  
666 independent experiments). **(B)** 24h post infection, PCLS were washed and  
667 homogenized to recover bacilli. Inoculum and PCLS homogenates were serially  
668 diluted and plated with CFUs numerated after 3-6 weeks incubation. Individual data  
669 and the mean in each group are presented (n=6 independent inocula prepared,  
670 PCLS homogenates data represent the mean of technical duplicates from n=3  
671 animals, from 3 independent experiments).

672

673 **Figure 2: Mb3601 is internalized by AMPs in the preserved lung structure from**  
674 **PCLS and infected alveoli contain higher numbers of AMPs as compared to**  
675 **non-infected alveoli**



676 PCLS were infected with  $10^5$  CFUs of the green fluorescent Mb3601-GFP  
677 recombinant strain and fixed 2 days later. After labelling with anti-pancytokeratine  
678 (APC, magenta) and anti-MHCII antibodies (Alexa 555, red), PCLS were mounted  
679 with Fluoromount-G™ Mounting Medium containing DAPI (blue) and analyzed under  
680 a Leica confocal microscope **(A)**; 3D images were analyzed with Leica LAS  
681 software. Z-stack imaging was performed at x63 enlargement (10-15µm of thickness,  
682 step size of 0.5-1µm). White asterisks indicate extracellular bacilli and white arrows  
683 indicate bacilli inside MHC-II<sup>pos</sup> AMPs. **(B)** Graph represents the percentage of  
684 infected alveoli per PCLS among the 55 to 80 alveoli that were observed under the  
685 microscope (n=4 PCLS from two different Blonde d'Aquitaine cattle) **(C)** Stack  
686 histogram of the mean percentage +/- SEM of intra or extracellular bacilli among a  
687 minimum of 15 infected alveoli that were observed (N=4 PCLS) **(D)** The number of  
688 MHC-II<sup>pos</sup> AMPs per alveoli was counted in infected or non-infected alveoli. The data  
689 presented as % are the mean +/- SEM of n=4 PCLS from two different Blonde  
690 d'Aquitaine cattle. Between 55 and 80 alveoli were observed to obtain these data  
691 (two way ANOVA, \*\*\*  $p < 0.001$ )

692

693 **Figure 3: Principal Component Analysis (PCA) of inflammatory lung tissue**  
694 **signature reveals differences between two beef cattle breeds after 2 days of**  
695 **infection by Mb or Mtb.**

696 **(A)** Fifteen cytokines and chemokines were measured in PCLS supernatants from  
697 Blonde d'Aquitaine or Charolaise cows 2 days after infection with four different  
698 mycobacterial strains. Raw data were used to run PCA in R studio. Individual data  
699 are shown (n=4 for Charolaise, red; n=6 for Blonde d'Aquitaine, blue). Ellipses  
700 represent a confidence range of 90%. **(B)** PCA were built from expression data of 96  
701 genes ( $2^{-\Delta\Delta Ct}$ ) obtained from PCLS total RNA extracted 2 days after infection.  
702 Individual data are shown (n=9 for Charolaise, red; n=7 for Blonde d'Aquitaine, blue).  
703 Ellipses represent a confidence range of 90%. **(C)** Two examples of differentially  
704 expressed genes. Individual data and the median and interquartile range in each  
705 group are presented (n=7 Blonde d'Aquitaine and n=9 Charolaise) \*  $p < 0.05$ . \*\*  
706  $p < 0.01$ . \*\*\*  $p < 0.001$ . Two way ANOVA test.

707

708 **Figure 4: The lung inflammatory neutrophil and monocyte recruitment**  
709 **signature induced by infection in PCLS from Blonde d'Aquitaine cows is more**  
710 **efficiently triggered by *M. bovis* than *M. tuberculosis***

711 **(A)** Cytokine and chemokine levels were measured in PCLS supernatant by Multiplex  
712 ELISA two days after infection with two Mb or two Mtb strains. Individual data and the  
713 median and interquartile range in each group are presented (n=6 cows). **(B)** Table of  
714 the mean of fold change ( $2^{-ddCT}$ ) for each group (n=7 cows) of 17 major genes  
715 involved in neutrophil and monocyte recruitment and inflammation. The graduated  
716 red box coloring represents levels of gene expression, and asterisks mark significant  
717 differences compared to non-infected controls. **(C)** *CXCL2*, *CXCL5* and *CXCL8* gene  
718 expression at 2 days post infection. Individual data and the median and interquartile  
719 range in each group are presented (n=7 cows). (B-C) \*  $p < 0.05$  (Wilcoxon non  
720 parametric test).

721

722 **Figure 5: Mb but not Mtb infection in the lung tissue from Blonde d'Aquitaine**  
723 **cows induces the type I interferon pathway.**

724 PCLS were infected as described in Figure 1. **(A)** *IFNAR*, *ISG15*, *CXCL10* and *OAS1*  
725 gene expression at 2 dpi. Individual data and the median and interquartile range in  
726 each group are presented (n=7) **(B)** *CXCL10* protein level was measured in PCLS  
727 supernatant at 2 dpi. Individual data and the median and interquartile range in each  
728 group are presented (n=6). **(C)** The table represents the mean of fold change ( $2^{-ddCT}$ )  
729 for each group (n=7) of major genes involved in type I interferon pathway. Graduated  
730 red box coloring are for higher gene expression and asterisks mark significant  
731 differences compared to uninfected PCLS. nd=not detected. **(D)** Ingenuity Pathway  
732 Analysis drawing of the Type I interferon pathway under *IFNAR* in the Mb3601 group.  
733 Graduated red box coloring are for higher gene expression. (A, B and C) \*  $p < 0.05$   
734 (Wilcoxon non parametric test).

735

736 **Figure 6: Alveolar macrophages from Blonde d'Aquitaine contribute to the type**  
737 **I IFN signature in lung induced by Mb infection**

738 AMPs from Blonde d'Aquitaine lungs were infected with  $10^5$  cfu of Mb3601 or Mtb  
739 H37Rv. 6 h later mRNA was extracted from and expression of major genes from the  
740 type 1 IFN pathway was analyzed **(A)** Mean fold change ( $2^{-ddCT}$ ) of gene expression  
741 normalized to three house keeping genes was calculated in each group (n=7).

742 Graduated red box coloring represents gene expression and asterisks mark  
743 significant differences compared to non infected controls (nd=not detected). **(B)**  
744 *IFN $\beta$* , *LPG2*, *RIG1*, *MX1* and *OAS1* gene expression in AMPs was analysed by RT-  
745 qPCR at 6h post infection. Individual data and the median and interquartile range in  
746 each group are presented (n=7). **(A, B)** \*  $p < 0.05$  (Wilcoxon non parametric test).

747

748 **Figure 7: Superposition of Blonde d'Aquitaine and Charolaise beef breeds in**  
749 **French counties where Mb outbreaks were declared between December 2019**  
750 **and 2020.**

751 This map of France shows counties where Mb outbreaks were declared between  
752 December 2019 and December 2020 (yellow stars) and was obtained with data  
753 extracted from <https://www.plateforme-esa.fr/>. Herd densities of Blonde d'Aquitaine  
754 (blue), Charolaise (red) or both breeds (violet) were extracted from data obtained  
755 from <https://www.racesdefrance.fr> (cows above 3-years-old have been considered).

756

757 **Supplementary table and figures legends**

758

759 **Supplementary Table S1. Sequences of primers used in this study.**

760 Primers were designed using Geneious software, in intron-spanning regions when  
761 possible. The annealing temperature was set at 60°C. Housekeeping genes used as  
762 the reference to calculate  $\Delta CT$  are indicated in the grey boxes.

763

764 **Figure S1: Age and geographical origin of cows used in the study**

765 The Charolaise and Blonde d'Aquitaine cows used were between 3- to 11-years-old,  
766 and came from 8 different French departments. Two Blonde d'Aquitaine cows came  
767 from the same farm in Indre et Loire; et three Charolaise cows from the same farm in  
768 Sarthe. All other animals are from distinct farms. Data represent the age of individual  
769 animal and the median and interquartile range.

770

771 **Figure S2: Transcriptomic signature after infection with different doses of**  
772 **mycobacteria**

773 Bovine PCLS were obtained as described in Fig. 1 and infected with  $10^5$ ,  $5 \times 10^5$ ,  $10^6$   
774 or  $5 \times 10^6$  cfu. RNA were extracted 2 dpi after infection and *SDC4*, *CXCL1*, *HIF1* and  
775 *OAS1* gene expression were assessed with the Fluidigm Biomark. Individual data

776 and the mean and standard deviation in each group are presented (n=3 Charolaise).  
777 The dotted line represent the level of expression in the uninfected group.

778

779 **Figure S3: Cytokines/Chemokines in PCLS supernatants.**

780 Protein levels were measured in PCLS supernatant at 2 dpi post infection with  
781 Multiplex. Individual data and the median and interquartile range in each group are  
782 presented (n=6). \*  $p < 0.05$  (Wilcoxon non parametric test).

783

784 **Figure S4: Structure of bovine PCLS under light microscope.**

785 PCLS were observed under a light microscope (enlargement x40 to x200). PCLS  
786 contain numerous alveoli and between one to three bronchioles, with thick and wavy  
787 epithelium that can be easily recognized (black asterisk). Thin blood vessels (red  
788 dotted lines) were localised next to bronchioles and diffused between alveoli. No  
789 blood cells remained inside the endothelium (cows were bled out at the abattoir).  
790 Alveolar macrophages can be seen inside alveoli (black arrows).

791

792 **Supplementary video 1: Internalisation of Mb3601 in alveolar macrophages**  
793 **after PCLS *ex vivo* infection.**

794 PCLS were fixed at 2 dpi with  $10^5$  cfu of Mb3601-GFP recombinant strain, and  
795 labeled with anti-pancytokeratine and anti-MHCII antibodies, respectively revealed  
796 with APC, and Alexa 555 conjugated secondary Ab. PCLS were transferred on  
797 coverslides and mounted with Fluoromount-G™ Mounting Medium, containing DAPI.  
798 Z-stack imaging was performed at x63 enlargement with a confocal microscope. 3D  
799 images were analyzed with Leica LAS software.

800

801 **REFERENCES**

- 802 [1] S.H. Downs, A. Prosser, A. Ashton, S. Ashfield, L.A. Brunton, A. Brouwer, P. Upton, A.  
803 Robertson, C.A. Donnelly, and J.E. Parry, Assessing effects from four years of  
804 industry-led badger culling in England on the incidence of bovine tuberculosis in  
805 cattle, 2013-2017. *Sci Rep* 9 (2019) 14666.  
806 [2] A. Pereira, A. Reis, B. Ramos, and M. Cunha, Animal tuberculosis: Impact of disease  
807 heterogeneity in transmission, diagnosis and control. *Transbound Emerg Dis* (2020).  
808 [3] A. Hauer, K. De Cruz, T. Cochard, S. Godreuil, C. Karoui, S. Henault, T. Bulach, A.L.  
809 Banuls, F. Biet, and M.L. Boschirolì, Genetic evolution of *Mycobacterium bovis*  
810 causing tuberculosis in livestock and wildlife in France since 1978. *PLoS One* 10  
811 (2015) e0117103.  
812 [4] E. Reveillaud, S. Desvaux, M.L. Boschirolì, J. Hars, E. Faure, A. Fediaevsky, L. Cavalerie,  
813 F. Chevalier, P. Jabert, S. Poliak, I. Tourette, P. Hendrikx, and C. Richomme,

- 814 Infection of Wildlife by *Mycobacterium bovis* in France Assessment Through a  
815 National Surveillance System, *Sylvatub*. *Front Vet Sci* 5 (2018) 262.
- 816 [5] E. Harding, WHO global progress report on tuberculosis elimination. *Lancet Respir Med* 8  
817 (2020) 19.
- 818 [6] S. Cole, R. Brosch, J. Parkhill, T. Garnier, C. Churcher, D. Harris, S. Gordon, K.  
819 Eiglmeier, Gas S, Barry CE 3rd, Tekaia F, Badcock K, Basham D, Brown D,  
820 Chillingworth T, Connor R, Davies R, Devlin K, Feltwell T, Gentles S, Hamlin N,  
821 Holroyd S, Hornsby T, Jagels K, Krogh A, McLean J, Moule S, Murphy L, Oliver K,  
822 Osborne J, Quail MA, Rajandream MA, Rogers J, Rutter S, Seeger K, Skelton J,  
823 Squares R, Squares S, Sulston JE, Taylor K, S. Whitehead, and B. Barrell,  
824 Deciphering the biology of *Mycobacterium tuberculosis* from the complete genome  
825 sequence. *Nature* 393 (1998) 537-44.
- 826 [7] A.O. Whelan, M. Coad, P.J. Cockle, G. Hewinson, M. Vordermeier, and S.V. Gordon,  
827 Revisiting host preference in the *Mycobacterium tuberculosis* complex: experimental  
828 infection shows *M. tuberculosis* H37Rv to be avirulent in cattle. *PLoS One* 5 (2010)  
829 e8527.
- 830 [8] D.A. Magee, K. Conlon, N.C. Nalpas, J.A. Browne, C. Pirson, C. Healy, K.E. McLoughlin,  
831 J. Chen, M.H. Vordermeier, E. Gormley, D. MacHugh, and S. Gordon, Innate cytokine  
832 profiling of bovine alveolar macrophages reveals commonalities and divergence in  
833 the response to *Mycobacterium bovis* and *Mycobacterium tuberculosis* infection.  
834 *Tuberculosis (Edinb)* 94 (2014) 441-50.
- 835 [9] G. Ameni, M. Vordermeier, R. Firdessa, A. Aseffa, G. Hewinson, S.V. Gordon, and S.  
836 Berg, *Mycobacterium tuberculosis* infection in grazing cattle in central Ethiopia. *Vet J*  
837 188 (2011) 359-61.
- 838 [10] J.M. van den Berg, E. van Koppen, A. Ahlin, B.H. Belohradsky, E. Bernatowska, L.  
839 Corbeel, T. Espanol, A. Fischer, M. Kurenko-Deptuch, R. Mouy, T. Petropoulou, J.  
840 Roesler, R. Seger, M.J. Stasia, N.H. Valerius, R.S. Weening, B. Wolach, D. Roos,  
841 and T.W. Kuijpers, Chronic granulomatous disease: the European experience. *PLoS*  
842 *One* 4 (2009) e5234.
- 843 [11] T. Garnier, K. Eiglmeier, J.C. Camus, N. Medina, H. Mansoor, M. Pryor, S. Duthoy, S.  
844 Grondin, C. Lacroix, C. Monsempe, S. Simon, B. Harris, R. Atkin, J. Doggett, R.  
845 Mayes, L. Keating, P.R. Wheeler, J. Parkhill, B.G. Barrell, S.T. Cole, S.V. Gordon,  
846 and R.G. Hewinson, The complete genome sequence of *Mycobacterium bovis*. *Proc*  
847 *Natl Acad Sci U S A* 100 (2003) 7877-82.
- 848 [12] K.M. Malone, D. Farrell, T.P. Stuber, O.T. Schubert, R. Aebersold, S. Robbe-Austerman,  
849 and S.V. Gordon, Updated Reference Genome Sequence and Annotation of  
850 *Mycobacterium bovis* AF2122/97. *Genome Announc* 5 (2017).
- 851 [13] B. Villarreal-Ramos, S. Berg, A. Whelan, S. Holbert, F. Carreras, F.J. Salguero, B.L.  
852 Khatri, K. Malone, K. Rue-Albrecht, R. Shaughnessy, A. Smyth, G. Ameni, A. Aseffa,  
853 P. Sarradin, N. Winter, M. Vordermeier, and S.V. Gordon, Experimental infection of  
854 cattle with *Mycobacterium tuberculosis* isolates shows the attenuation of the human  
855 tubercle bacillus for cattle. *Sci Rep* 8 (2018) 894.
- 856 [14] N. Smith, S. Berg, J. Dale, A. Allen, S. Rodriguez, B. Romero, F. Matos, S.  
857 Ghebremichael, D.C. Karoui C, Machado Ada C, Mucavele C, Kazwala RR, Hilty M,  
858 Cadmus S, Ngandolo BN, Habtamu M, Oloya J, Muller A, Milian-Suazo F,  
859 Andrievskaia O, Projahn M, Barandiarán S, Macías A, Müller B, Zanini MS, Ikuta CY,  
860 Rodriguez CA, Pinheiro SR, Figueroa A, Cho SN, Mosavari N, Chuang PC, Jou R,  
861 Zinsstag J, van Soolingen D, Costello E, Aseffa A, Proaño-Perez F, Portaels F,  
862 Rigouts L, Cataldi AA, Collins DM, Boschirolu ML, Hewinson RG, Ferreira Neto JS,  
863 Surujballi O, Tadyon K, Botelho A, Zárraga AM, Buller N, Skuce R, Michel A, Aranaz  
864 A, , S. Gordon, B. Jeon, G. Källenius, S. Niemann, M. Boniotti, P. van Helden, B.  
865 Harris, M. Zumárraga, and K. Kremer, European 1: a globally important clonal  
866 complex of *Mycobacterium bovis*. *Infect Genet Evol* 11 (2011) 1340-51.



- 867 [15] M. Branger, V. Loux, T. Cochard, M. Boschioli, F. Biet, and L. Michelet, The complete  
868 genome sequence of *Mycobacterium bovis* Mb3601, a SB0120 spoligotype strain  
869 representative of a new clonal group. *Infect Genet Evol* 82 (2020).
- 870 [16] A. Hauer, L. Michelet, T. Cochard, M. Branger, J. Nunez, M.L. Boschioli, and F. Biet,  
871 Accurate Phylogenetic Relationships Among *Mycobacterium bovis* Strains Circulating  
872 in France Based on Whole Genome Sequencing and Single Nucleotide  
873 Polymorphism Analysis. *Front Microbiol* 10 (2019) 955.
- 874 [17] R. Brosch, S.V. Gordon, T. Garnier, K. Eiglmeier, W. Frigui, P. Valenti, S. Dos Santos,  
875 S. Duthoy, C. Lacroix, C. Garcia-Pelayo, J.K. Inwald, P. Golby, J.N. Garcia, R.G.  
876 Hewinson, M.A. Behr, M.A. Quail, C. Churcher, B.G. Barrell, J. Parkhill, and S.T.  
877 Cole, Genome plasticity of BCG and impact on vaccine efficacy. *Proc Natl Acad Sci U*  
878 *S A* 104 (2007) 5596-601.
- 879 [18] C. Cosma, O. Humbert, and L. Ramakrishnan, Superinfecting mycobacteria home to  
880 established tuberculous granulomas. *Nature Immunology* 5 (2004) 828-35.
- 881 [19] J. Cassidy, The pathogenesis and pathology of bovine tuberculosis with insights from  
882 studies of tuberculosis in humans and laboratory animal models. *Veterinary*  
883 *Microbiology* 112 (2006) 151-61.
- 884 [20] J.M. Scordo, D.L. Knoell, and J.B. Torrelles, Alveolar Epithelial Cells in *Mycobacterium*  
885 *tuberculosis* Infection: Active Players or Innocent Bystanders? *J Innate Immun* 8  
886 (2016) 3-14.
- 887 [21] Y. Li, Y. Wang, and X. Liu, The role of airway epithelial cells in response to mycobacteria  
888 infection. *Clin Dev Immunol* 2012 (2012) 791392.
- 889 [22] M.B. Ryndak, and S. Laal, *Mycobacterium tuberculosis* Primary Infection and  
890 Dissemination: A Critical Role for Alveolar Epithelial Cells. *Front Cell Infect Microbiol*  
891 9 (2019) 299.
- 892 [23] V.V. Thacker, N. Dhar, K. Sharma, R. Barrile, K. Karalis, and J.D. McKinney, A lung-on-  
893 chip model of early *Mycobacterium tuberculosis* infection reveals an essential role for  
894 alveolar epithelial cells in controlling bacterial growth. *Elife* 9 (2020).
- 895 [24] K. Sato, H. Tomioka, T. Shimizu, T. Gonda, F. Ota, and C. Sano, Type II alveolar cells  
896 play roles in macrophage-mediated host innate resistance to pulmonary  
897 mycobacterial infections by producing proinflammatory cytokines. *Journal of*  
898 *Infectious Disease* 185 (2002) 1139-47.
- 899 [25] D.F. Lee, G.R. Stewart, and M.A. Chambers, Modelling early events in *Mycobacterium*  
900 *bovis* infection using a co-culture model of the bovine alveolus. *Sci Rep* 10 (2020)  
901 18495.
- 902 [26] K. Goris, S. Uhlenbruck, C. Schwegmann-Wessels, W. Kohl, F. Niedorf, M. Stern, M.  
903 Hewicker-Trautwein, R. Bals, G. Taylor, A. Braun, G. Bicker, M. Kietzmann, and G.  
904 Herrler, Differential sensitivity of differentiated epithelial cells to respiratory viruses  
905 reveals different viral strategies of host infection. *J Virol* 83 (2009) 1962-8.
- 906 [27] Q. Marquant, D. Laubretton, C. Drjac, E. Mathieu, E. Bouguyon, M.L. Noordine, A.  
907 Remot, S. Riffault, M. Thomas, and D. Descamps, The microbiota plays a critical role  
908 in the reactivity of lung immune components to innate ligands. *FASEB J* 35 (2021)  
909 e21348.
- 910 [28] P. Carranza-Rosales, I.E. Carranza-Torres, N.E. Guzman-Delgado, G. Lozano-Garza, L.  
911 Villarreal-Trevino, C. Molina-Torres, J.V. Villarreal, L. Vera-Cabrera, and J. Castro-  
912 Garza, Modeling tuberculosis pathogenesis through ex vivo lung tissue infection.  
913 *Tuberculosis (Edinb)* 107 (2017) 126-132.
- 914 [29] K.J. Bryson, D. Garrido, M. Esposito, G. McLachlan, P. Digard, C. Schouler, R.  
915 Guabiraba, S. Trapp, and L. Vervelde, Precision cut lung slices: a novel versatile tool  
916 to examine host-pathogen interaction in the chicken lung. *Vet Res* 51 (2020) 2.
- 917 [30] T. Thacker, M. Palmer, and W. Waters, Associations between cytokine gene expression  
918 and pathology in *Mycobacterium bovis* infected cattle. *Veterinary Immunology and*  
919 *Immunopathology* 119 (2007) 204-13.
- 920 [31] K.M. Malone, K. Rue-Albrecht, D.A. Magee, K. Conlon, O.T. Schubert, N.C. Nalpas, J.A.  
921 Browne, A. Smyth, E. Gormley, R. Aebersold, D.E. MacHugh, and S.V. Gordon,



- 922 Comparative 'omics analyses differentiate *Mycobacterium tuberculosis* and  
923 *Mycobacterium bovis* and reveal distinct macrophage responses to infection with the  
924 human and bovine tubercle bacilli. *Microb Genom* 4 (2018).
- 925 [32] A.R. Allen, G. Minozzi, E.J. Glass, R.A. Skuce, S.W. McDowell, J.A. Woolliams, and  
926 S.C. Bishop, Bovine tuberculosis: the genetic basis of host susceptibility. *Proc Biol*  
927 *Sci* 277 (2010) 2737-45.
- 928 [33] V. Abadie, E. Badell, P. Douillard, D. Ensergueix, P.J. Leenen, M. Tanguy, L. Fiette, S.  
929 Saeland, B. Gicquel, and N. Winter, Neutrophils rapidly migrate via lymphatics after  
930 *Mycobacterium bovis* BCG intradermal vaccination and shuttle live bacilli to the  
931 draining lymph nodes. *Blood* 106 (2005) 1843-50.
- 932 [34] M.P.R. Berry, C.M. Graham, F.W. McNab, Z. Xu, S.A.A. Bloch, T. Oni, K.A. Wilkinson,  
933 R. Banchereau, R.J.W. Jason Skinner, Charles Quinn, Derek Blankenship, Ranju  
934 Dhawan, John J. Cush, Asuncion Mejias, Octavio Ramilo, Onn M. Kon, Virginia  
935 Pascual, J. Banchereau, D. Chaussabel, and A. O'Garra, An Interferon-Inducible  
936 Neutrophil-Driven Blood Transcriptional Signature in Human Tuberculosis. *Nature*  
937 466 (2010) 973-977.
- 938 [35] L. Moreira-Teixeira, K. Mayer-Barber, A. Sher, and A. O'Garra, Type I interferons in  
939 tuberculosis: Foe and occasionally friend. *J Exp Med* 215 (2018) 1273-1285.
- 940 [36] D.X. Ji, L.H. Yamashiro, K.J. Chen, N. Mukaida, I. Kramnik, K.H. Darwin, and R.E.  
941 Vance, Type I interferon-driven susceptibility to *Mycobacterium tuberculosis* is  
942 mediated by IL-1Ra. *Nat Microbiol* 4 (2019) 2128-2135.
- 943 [37] F. Menzies, and S. Neill, Cattle-to-cattle transmission of bovine tuberculosis. *Veterinary*  
944 *Journal* 160 (2000) 92-106.
- 945 [38] A. Neupane, M. Willson, A. Krzysztof Chojnacki, F. Vargas E Silva Castanheira, C.  
946 Morehouse, A. Carestia, A. Keller, M. Peiseler, A. DiGiandomenico, M. Kelly, M.  
947 Amrein, C. Jenne, A. Thanabalasuriar, and P. Kubes, Patrolling Alveolar  
948 Macrophages Conceal Bacteria from the Immune System to Maintain Homeostasis.  
949 *Cell* 183 (2020) 110-125.
- 950 [39] C.J. Queval, R. Brosch, and R. Simeone, The Macrophage: A Disputed Fortress in the  
951 Battle against *Mycobacterium tuberculosis*. *Front Microbiol* 8 (2017) 2284.
- 952 [40] D. Wedlock, R. Kawakami, J. Koach, B. Buddle, and D. Collins, Differences of gene  
953 expression in bovine alveolar macrophages infected with virulent and attenuated  
954 isogenic strains of *Mycobacterium bovis*. *Int Immunopharmacol* 6 (2006) 957-61.
- 955 [41] C.J. Queval, A. Fearn, L. Botella, A. Smyth, L. Schnettger, M. Mitermite, E. Wooff, B.  
956 Villarreal-Ramos, W. Garcia-Jimenez, T. Heunis, M. Trost, D. Werling, F.J. Salguero,  
957 S.V. Gordon, and M.G. Gutierrez, Macrophage-specific responses to human- and  
958 animal-adapted tubercle bacilli reveal pathogen and host factors driving  
959 multinucleated cell formation. *PLoS Pathog* 17 (2021) e1009410.
- 960 [42] J. Ferguson, and L. Schlesinger, Pulmonary surfactant in innate immunity and the  
961 pathogenesis of tuberculosis. *Tuberculosis Lung Disease* 80 (2000) 173-84.
- 962 [43] J. Cassidy, and A. Martineau, Innate resistance to tuberculosis in man, cattle and  
963 laboratory animal models: nipping disease in the bud? *Comparative Pathology* 151  
964 (2014) 291-308.
- 965 [44] M.V. Palmer, J. Wiarda, C. Kanipe, and T.C. Thacker, Early Pulmonary Lesions in Cattle  
966 Infected via Aerosolized *Mycobacterium bovis*. *Vet Pathol* 56 (2019) 544-554.
- 967 [45] A.R. Martineau, S.M. Newton, K.A. Wilkinson, B. Kampmann, B.M. Hall, N. Nawroly,  
968 G.E. Packe, R.N. Davidson, C.J. Griffiths, and R.J. Wilkinson, Neutrophil-mediated  
969 innate immune resistance to mycobacteria. *J Clin Invest* 117 (2007) 1988-94.
- 970 [46] T. McCorry, A. Whelan, M. Welsh, J. McNair, E. Walton, D. Bryson, R. Hewinson, H.  
971 Vordermeier, and J. Pollock, Shedding of *Mycobacterium bovis* in the nasal mucus of  
972 cattle infected experimentally with tuberculosis by the intranasal and intratracheal  
973 routes. *Veterinary Record* 157 (2005) 613-8.
- 974 [47] F. Su, X. Liu, G. Liu, Y. Yu, Y. Wang, Y. Jin, G. Hu, S. Hua, and Y. Zhang,  
975 Establishment and evaluation of a stable cattle type II alveolar epithelial cell line.  
976 *PLoS One* 8 (2013) e76036.

- 977 [48] G. Ameni, A. Aseffa, H. Engers, D. Young, S. Gordon, G. Hewinson, and M.  
978 Vordermeier, High prevalence and increased severity of pathology of bovine  
979 tuberculosis in Holsteins compared to zebu breeds under field cattle husbandry in  
980 central Ethiopia. *Clin Vaccine Immunol* 14 (2007) 1356-61.
- 981 [49] U. Castillo-Velázquez, R. Gomez-Flores, R. Tamez-Guerra, P. Tamez-Guerra, and C.  
982 Rodríguez-Padilla, Differential responses of macrophages from bovines naturally  
983 resistant or susceptible to *Mycobacterium bovis* after classical and alternative  
984 activation. *Veterinary Immunology and Immunopathology* 154 (2013) 8-16.
- 985 [50] K. Raphaka, E. Sanchez-Molano, S. Tsairidou, O. Anacleto, E.J. Glass, J.A. Woolliams,  
986 A. Doeschl-Wilson, and G. Banos, Impact of Genetic Selection for Increased Cattle  
987 Resistance to Bovine Tuberculosis on Disease Transmission Dynamics. *Front Vet Sci*  
988 5 (2018) 237.
- 989 [51] G. Banos, M. Winters, R. Mrode, A.P. Mitchell, S.C. Bishop, J.A. Woolliams, and M.P.  
990 Coffey, Genetic evaluation for bovine tuberculosis resistance in dairy cattle. *J Dairy*  
991 *Sci* 100 (2017) 1272-1281.
- 992 [52] K. Raphaka, O. Matika, E. Sanchez-Molano, R. Mrode, M.P. Coffey, V. Riggio, E.J.  
993 Glass, J.A. Woolliams, S.C. Bishop, and G. Banos, Genomic regions underlying  
994 susceptibility to bovine tuberculosis in Holstein-Friesian cattle. *BMC Genet* 18 (2017)  
995 27.
- 996 [53] I.W. Richardson, D.P. Berry, H.L. Wiencko, I.M. Higgins, S.J. More, J. McClure, D.J.  
997 Lynn, and D.G. Bradley, A genome-wide association study for genetic susceptibility to  
998 *Mycobacterium bovis* infection in dairy cattle identifies a susceptibility QTL on  
999 chromosome 23. *Genet Sel Evol* 48 (2016) 19.
- 1000 [54] S.C. Ring, D.C. Purfield, M. Good, P. Breslin, E. Ryan, A. Blom, R.D. Evans, M.L.  
1001 Doherty, D.G. Bradley, and D.P. Berry, Variance components for bovine tuberculosis  
1002 infection and multi-breed genome-wide association analysis using imputed whole  
1003 genome sequence data. *PLoS One* 14 (2019) e0212067.
- 1004 [55] S. Wilkinson, S.C. Bishop, A.R. Allen, S.H. McBride, R.A. Skuce, M. Bermingham, J.A.  
1005 Woolliams, and E.J. Glass, Fine-mapping host genetic variation underlying outcomes  
1006 to *Mycobacterium bovis* infection in dairy cows. *BMC Genomics* 18 (2017) 477.
- 1007 [56] L. Abel, J. Fellay, D.W. Haas, E. Schurr, G. Srikrishna, M. Urbanowski, N. Chaturvedi, S.  
1008 Srinivasan, D. Johnson, and W. Bishai, Genetics of human susceptibility to active and  
1009 latent tuberculosis: present knowledge and future perspectives. *Lancet Infect Dis* 18  
1010 (2018) e64-e75.
- 1011 [57] A. Allen, One bacillus to rule them all? - Investigating broad range host adaptation in  
1012 *Mycobacterium bovis*. *Infect Genet Evol* 53 (2017) 68-76.
- 1013 [58] J. Sabio Y García, M.M. Bigi, L.I. Klepp, E.A. García, F.F. Blanco, and F. Bigi, Does  
1014 *Mycobacterium bovis* persist in cattle in a non-replicative latent state as  
1015 *Mycobacterium tuberculosis* in human beings? *Vet Microbiol* 247 (2020).
- 1016 [59] J. Gonzalo-Asensio, W. Malaga, A. Pawlik, C. Astarie-Dequeker, C. Passemar, F.  
1017 Moreau, F. Laval, M. Daffe, C. Martin, R. Brosch, and C. Guilhot, Evolutionary history  
1018 of tuberculosis shaped by conserved mutations in the PhoPR virulence regulator.  
1019 *Proc Natl Acad Sci U S A* 111 (2014) 11491-6.
- 1020 [60] K. Huynh, S. Joshi, and E. Brown, A delicate dance: host response to mycobacteria.  
1021 *Current Opinion in Immunology* 23 (2011) 464-72.
- 1022 [61] D.G. Russell, *Mycobacterium tuberculosis* and the intimate discourse of a chronic  
1023 infection. *Immunol Rev* 240 (2011) 252-68.
- 1024 [62] N.C. Nalpas, D.A. Magee, K.M. Conlon, J.A. Browne, C. Healy, K.E. McLoughlin, K.  
1025 Rue-Albrecht, P.A. McGettigan, K.E. Killick, E. Gormley, S.V. Gordon, and D.E.  
1026 MacHugh, RNA sequencing provides exquisite insight into the manipulation of the  
1027 alveolar macrophage by tubercle bacilli. *Sci Rep* 5 (2015) 13629.
- 1028 [63] K. Jensen, I.J. Gallagher, N. Johnston, M. Welsh, R. Skuce, J.L. Williams, and E.J.  
1029 Glass, Variation in the Early Host-Pathogen Interaction of Bovine Macrophages with  
1030 Divergent *Mycobacterium bovis* Strains in the United Kingdom. *Infect Immun* 86  
1031 (2018).

- 1032 [64] M. Palmer, T. Thacker, M. Rabideau, G. Jones, C. Kanipe, H. Vordermeier, and W.  
1033 Waters, Biomarkers of cell-mediated immunity to bovine tuberculosis. *Veterinary*  
1034 *Immunology and Immunopathology* 220 (2020).
- 1035 [65] L. Chunfa, S. Xin, L. Qiang, S. Sreevatsan, L. Yang, D. Zhao, and X. Zhou, The Central  
1036 Role of IFI204 in IFN-beta Release and Autophagy Activation during *Mycobacterium*  
1037 *bovis* Infection. *Front Cell Infect Microbiol* 7 (2017) 169.
- 1038 [66] C. Liu, E. Yue, Y. Yang, Y. Cui, L. Yang, D. Zhao, and X. Zhou, AIM2 inhibits autophagy  
1039 and IFN- $\beta$  production during *M. bovis* infection. *Oncotarget* 7 (2016) 46972-46987.
- 1040 [67] J. Wang, T. Hussain, K. Zhang, Y. Liao, J. Yao, Y. Song, N. Sabir, G. Cheng, H. Dong,  
1041 M. Li, J. Ni, M.H. Mangi, D. Zhao, and X. Zhou, Inhibition of type I interferon signaling  
1042 abrogates early *Mycobacterium bovis* infection. *BMC Infect Dis* 19 (2019) 1031.
- 1043 [68] F. Olea-Popelka, A. Muwonge, A. Perera, A. Dean, E. Mumford, E. Erlacher-Vindel, S.  
1044 Forcella, B. Silk, L. Ditiu, A. El Idrissi, M. Raviglione, O. Cosivi, P. LoBue, and P.  
1045 Fujiwara, Zoonotic tuberculosis in human beings caused by *Mycobacterium bovis*-a  
1046 call for action. *Lancet Infect Dis* 17 (2017) e21-e25.  
1047

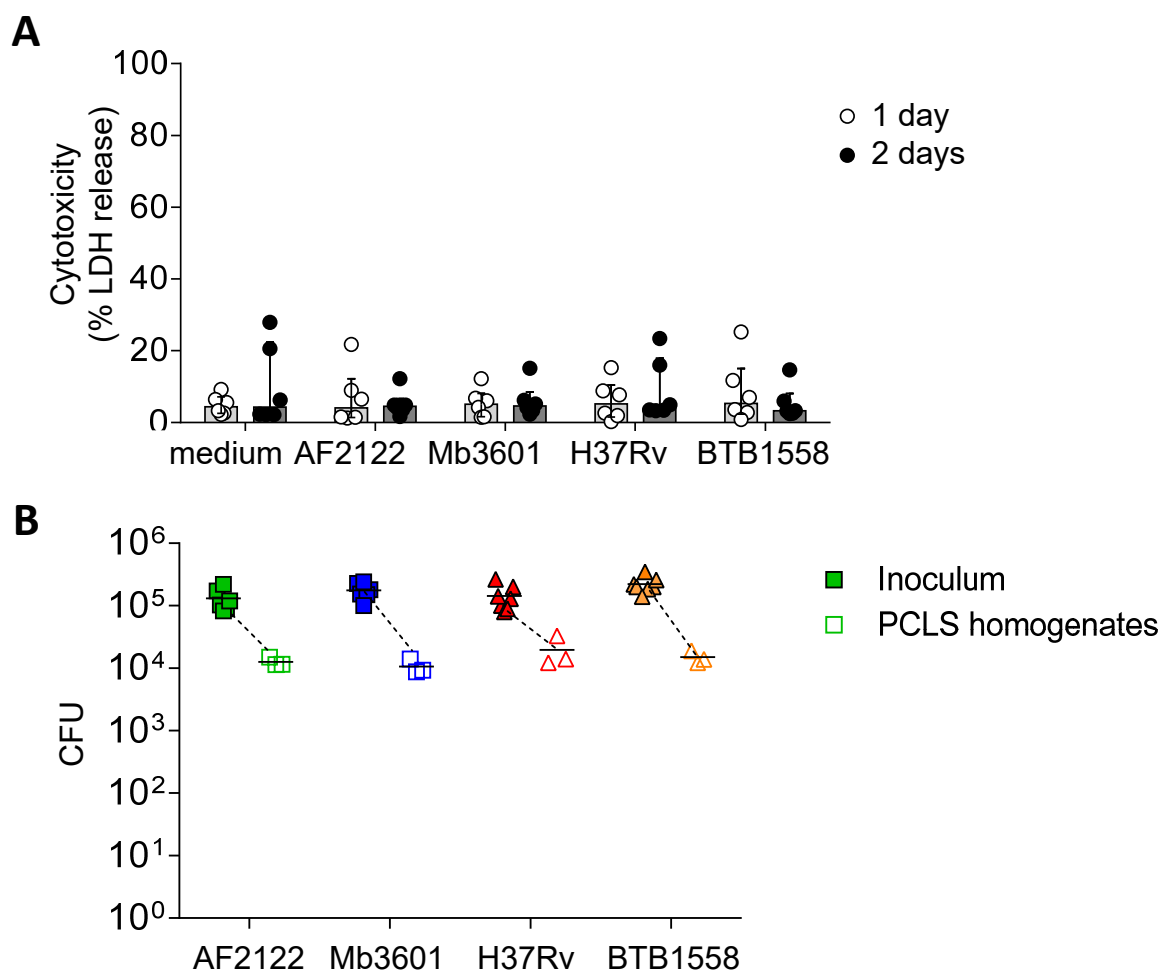

**Figure 1: PCLS infection with four different Mb or Mtb strains does not induce lung tissue cytotoxicity and equivalent numbers of bacilli are recovered 24 h post-infection**

**(A)** PCLS prepared from Blonde d'Aquitaine lungs post-mortem were infected with  $10^5$  cfu of two Mb strains (AF2122 or Mb3601) or two Mtb strains (H37Rv or BTB1558). After 1 and 2 days post infection, PCLS supernatants were harvested and tissue was homogenized. Lactate dehydrogenase (LDH) was measured in both compartments using the "Non-Radioactive Cytotoxicity Assay" kit. Cytotoxicity was determined as (%) =  $(\text{O.D.490nm LDH in supernatant}) / (\text{O.D.490nm LDH in supernatant} + \text{O.D.490nm LDH in PCLS homogenates}) \times 100$ . Individual data and the median and interquartile range in each group are presented ( $n=6$  animals, from 6 independent experiments). **(B)** 24h post infection, PCLS were washed and homogenized to recover bacilli. Inoculum and PCLS homogenates were serially diluted and plated with CFUs numerated after 3-6 weeks incubation. Individual data and the mean in each group are presented ( $n=6$  independent inocula prepared, PCLS homogenates data represent the mean of technical duplicates from  $n=3$  animals, from 3 independent experiments).

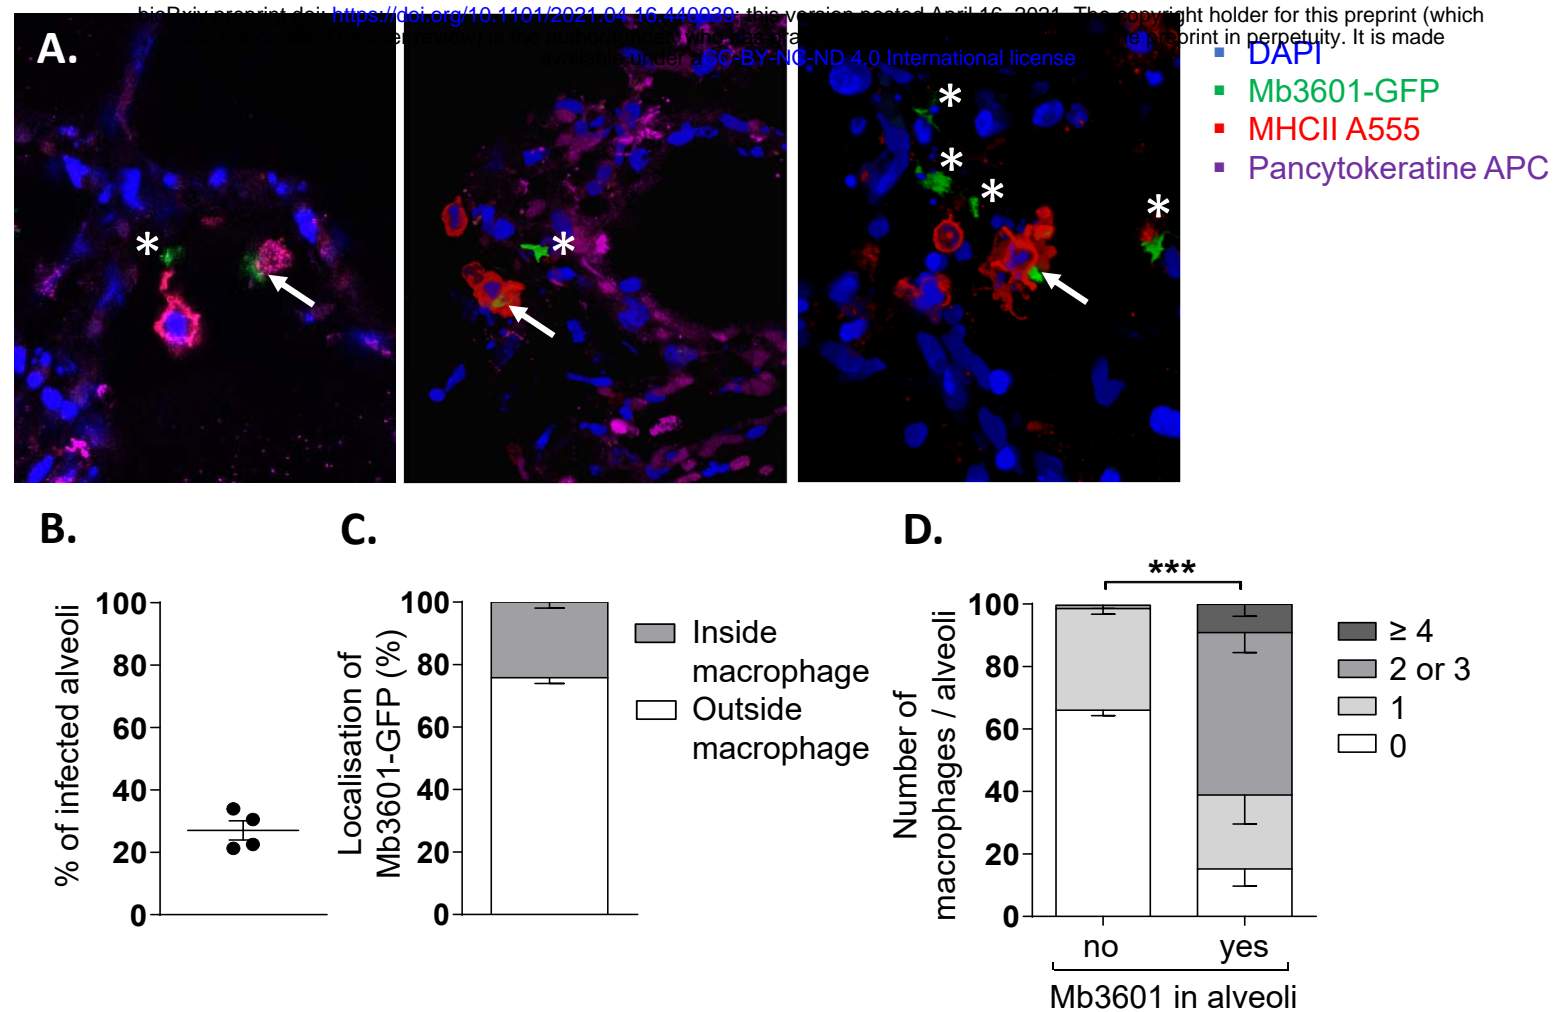

**Figure 2: Mb3601 is internalized by AMPs in the preserved lung structure from PCLS and infected alveoli contain higher numbers of AMPs as compared to non-infected alveoli**

PCLS were infected with  $10^5$  CFUs of the green fluorescent Mb3601-GFP recombinant strain and fixed 2 days later. After labelling with anti-pancytokeratine (APC, magenta) and anti-MHCII antibodies (Alexa 555, red), PCLS were mounted with Fluoromount-G™ Mounting Medium containing DAPI (blue) and analyzed under a Leica confocal microscope (A); 3D images were analyzed with Leica LAS software. Z-stack imaging was performed at x63 enlargement (10-15 $\mu$ m of thickness, step size of 0.5-1 $\mu$ m). White asterisks indicate extracellular bacilli and white arrows indicate bacilli inside MHC-II<sup>pos</sup> AMPs. (B) Graph represents the percentage of infected alveoli per PCLS among the 55 to 80 alveoli that were observed under the microscope (n=4 PCLS from two different Blonde d'Aquitaine cattle) (C) Stack histogram of the mean percentage +/- SEM of intra or extracellular bacilli among a minimum of 15 infected alveoli that were observed (N=4 PCLS) (D) The number of MHC-II<sup>pos</sup> AMPs per alveoli was counted in infected or non-infected alveoli. The data presented as % are the mean +/- SEM of n=4 PCLS from two different Blonde d'Aquitaine cattle. Between 55 and 80 alveoli were observed to obtain these data (two way ANOVA, \*\*\*  $p < 0.001$ )



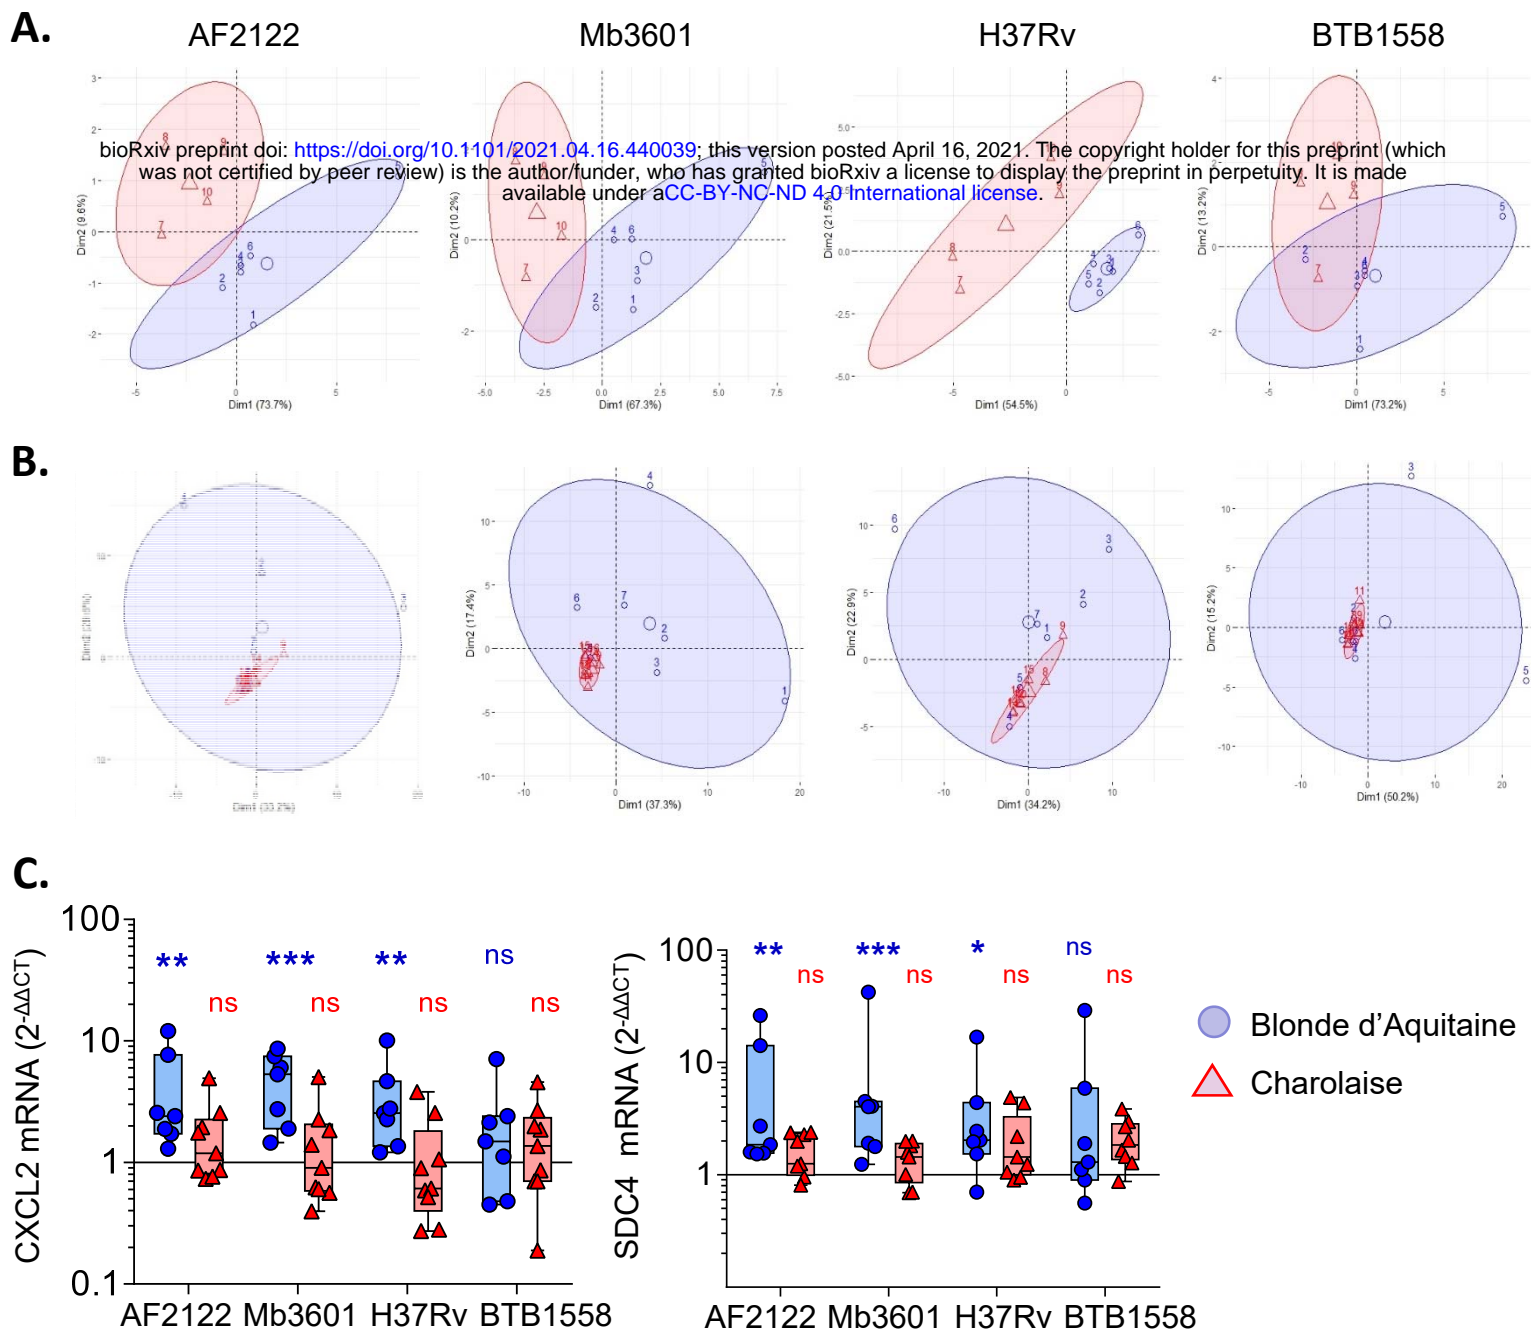

**Figure 3: Principal Component Analysis (PCA) of inflammatory lung tissue signature reveals differences between two beef cattle breeds after 2 days of infection by Mb or Mtb.**

(A) Fifteen cytokines and chemokines were measured in PCLS supernatants from Blonde d'Aquitaine or Charolaise cows 2 days after infection with four different mycobacterial strains. Raw data were used to run PCA in R studio. Individual data are shown (n=4 for Charolaise, red; n=6 for Blonde d'Aquitaine, blue). Ellipses represent a confidence range of 90%. (B) PCA were built from expression data of 96 genes ( $2^{-\Delta\Delta Ct}$ ) obtained from PCLS total RNA extracted 2 days after infection. Individual data are shown (n=9 for Charolaise, red; n=7 for Blonde d'Aquitaine, blue). Ellipses represent a confidence range of 90%. (C) Two examples of differentially expressed genes. Individual data and the median and interquartile range in each group are presented (n=7 Blonde d'Aquitaine and n=9 Charolaise) \*  $p < 0.05$ . \*\*  $p < 0.01$ . \*\*\*  $p < 0.001$ . Two way ANOVA test.



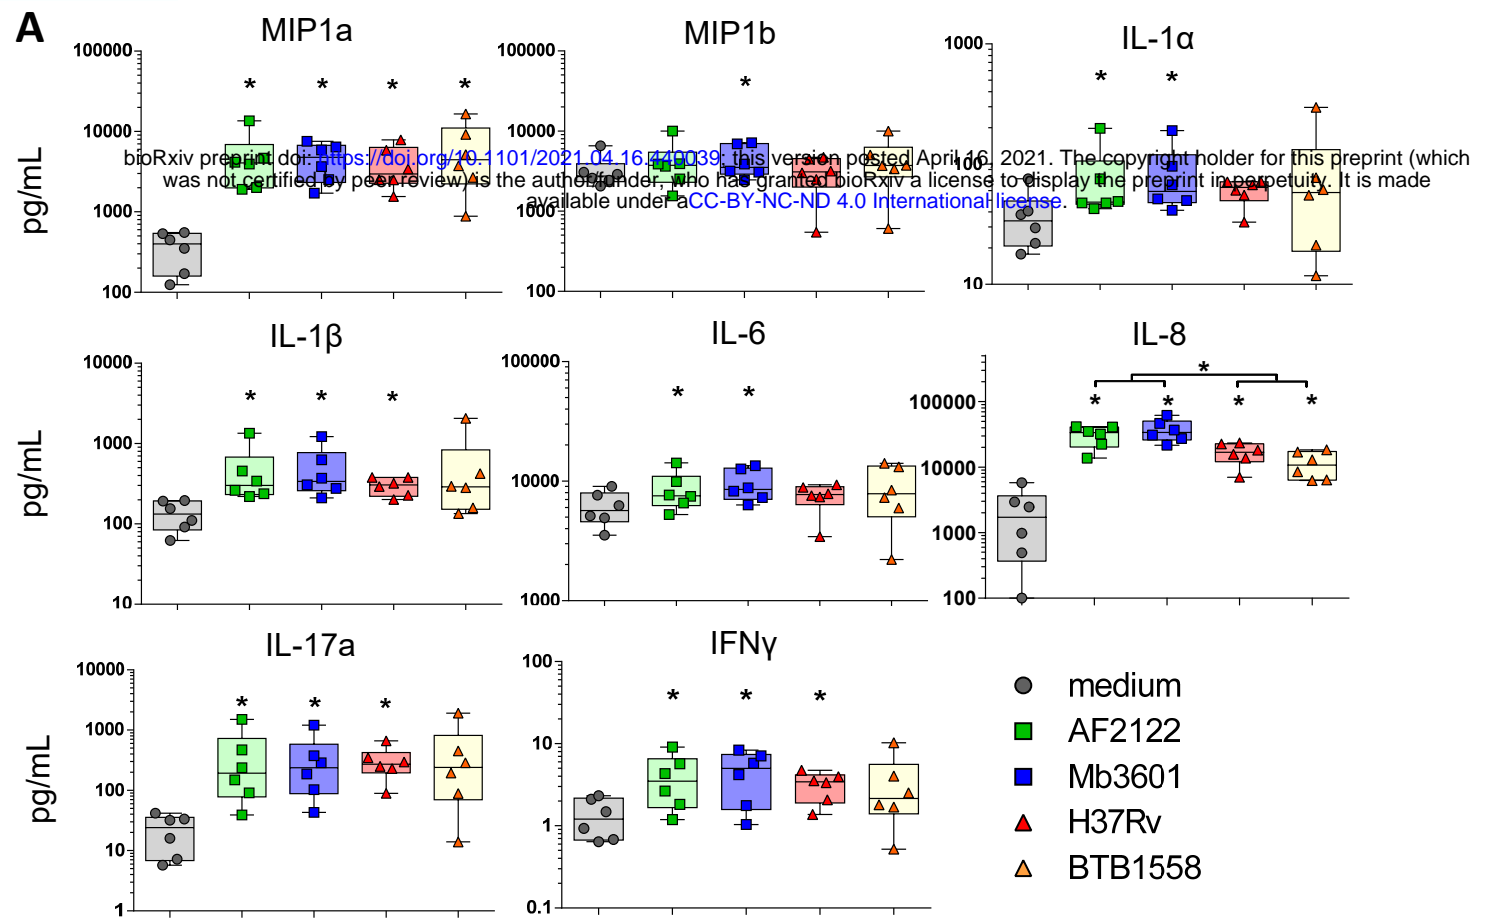

**B**

| Gene ID | AF2122 | Mb3601 | H37Rv | BTB1558 |
|---------|--------|--------|-------|---------|
| IL-1α   | 1.7    | 3.8    | 2.7   | 2.2     |
| IL-1β   | 1.9    | 4.1    | 2.5   | 3.4     |
| IL-6    | 4.2    | 7.3 *  | 4.2   | 4.5     |
| IL-17a  | 4.5    | 10.9   | 2.3   | 2.1     |
| CCL2    | 4.2    | 7.1    | 2.4   | 6.3     |
| CCL5    | 3.9    | 5.5    | 6.4   | 5.5     |
| CCL20   | 4.4    | 2.0    | 5.8   | 4.1     |
| CXCL1   | 3.2    | 4.2 *  | 3.3   | 3.0     |
| CXCL2   | 4.2 *  | 3.6 *  | 4.8 * | 2.2     |
| CXCL5   | 1.5    | 2.1 *  | 2.2   | 2.0     |
| CXCL8   | 3.6    | 4.8 *  | 4.0   | 4.7     |
| G-CSF   | 21.1 * | 1.7    | 8.3   | 3.9     |
| GM-CSF  | 3      | 1.5    | 4.3   | 7.5     |
| MIF     | 3.2    | 2.8    | 3.9   | 3.3     |
| S100A8  | 5.5    | 7.5    | 3.1   | 6.7     |
| S100A9  | 1.7    | 2.4    | 1.8   | 1.5     |
| TNFα    | 16.4   | 14.1   | 2.4   | 3.7     |

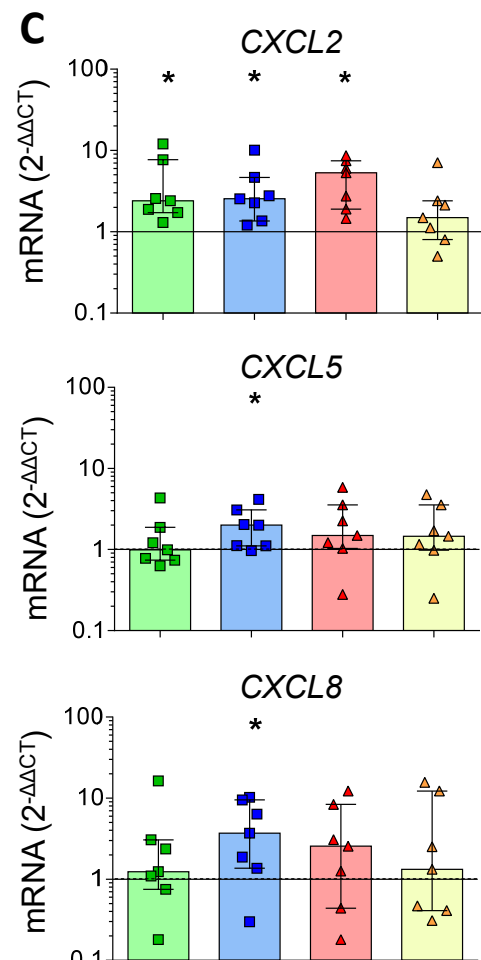

**Figure 4: The lung inflammatory neutrophil and monocyte recruitment signature induced by infection in PCLS from Blonde d'Aquitaine cows is more efficiently triggered by *M. bovis* than *M. tuberculosis***

**(A)** Cytokine and chemokine levels were measured in PCLS supernatant by Multiplex ELISA two days after infection with two Mb or two Mtb strains. Individual data and the median and interquartile range in each group are presented (n=6 cows). **(B)** Table of the mean of fold change ( $2^{-\Delta\Delta CT}$ ) for each group (n=7 cows) of 17 major genes involved in neutrophil and monocyte recruitment and inflammation. The graduated red box coloring represents levels of gene expression, and asterisks mark significant differences compared to non-infected controls. **(C)** *CXCL2*, *CXCL5* and *CXCL8* gene expression at 2 days post infection. Individual data and the median and interquartile range in each group are presented (n=7 cows). (B-C) \*  $p < 0.05$  (Wilcoxon non parametric test).

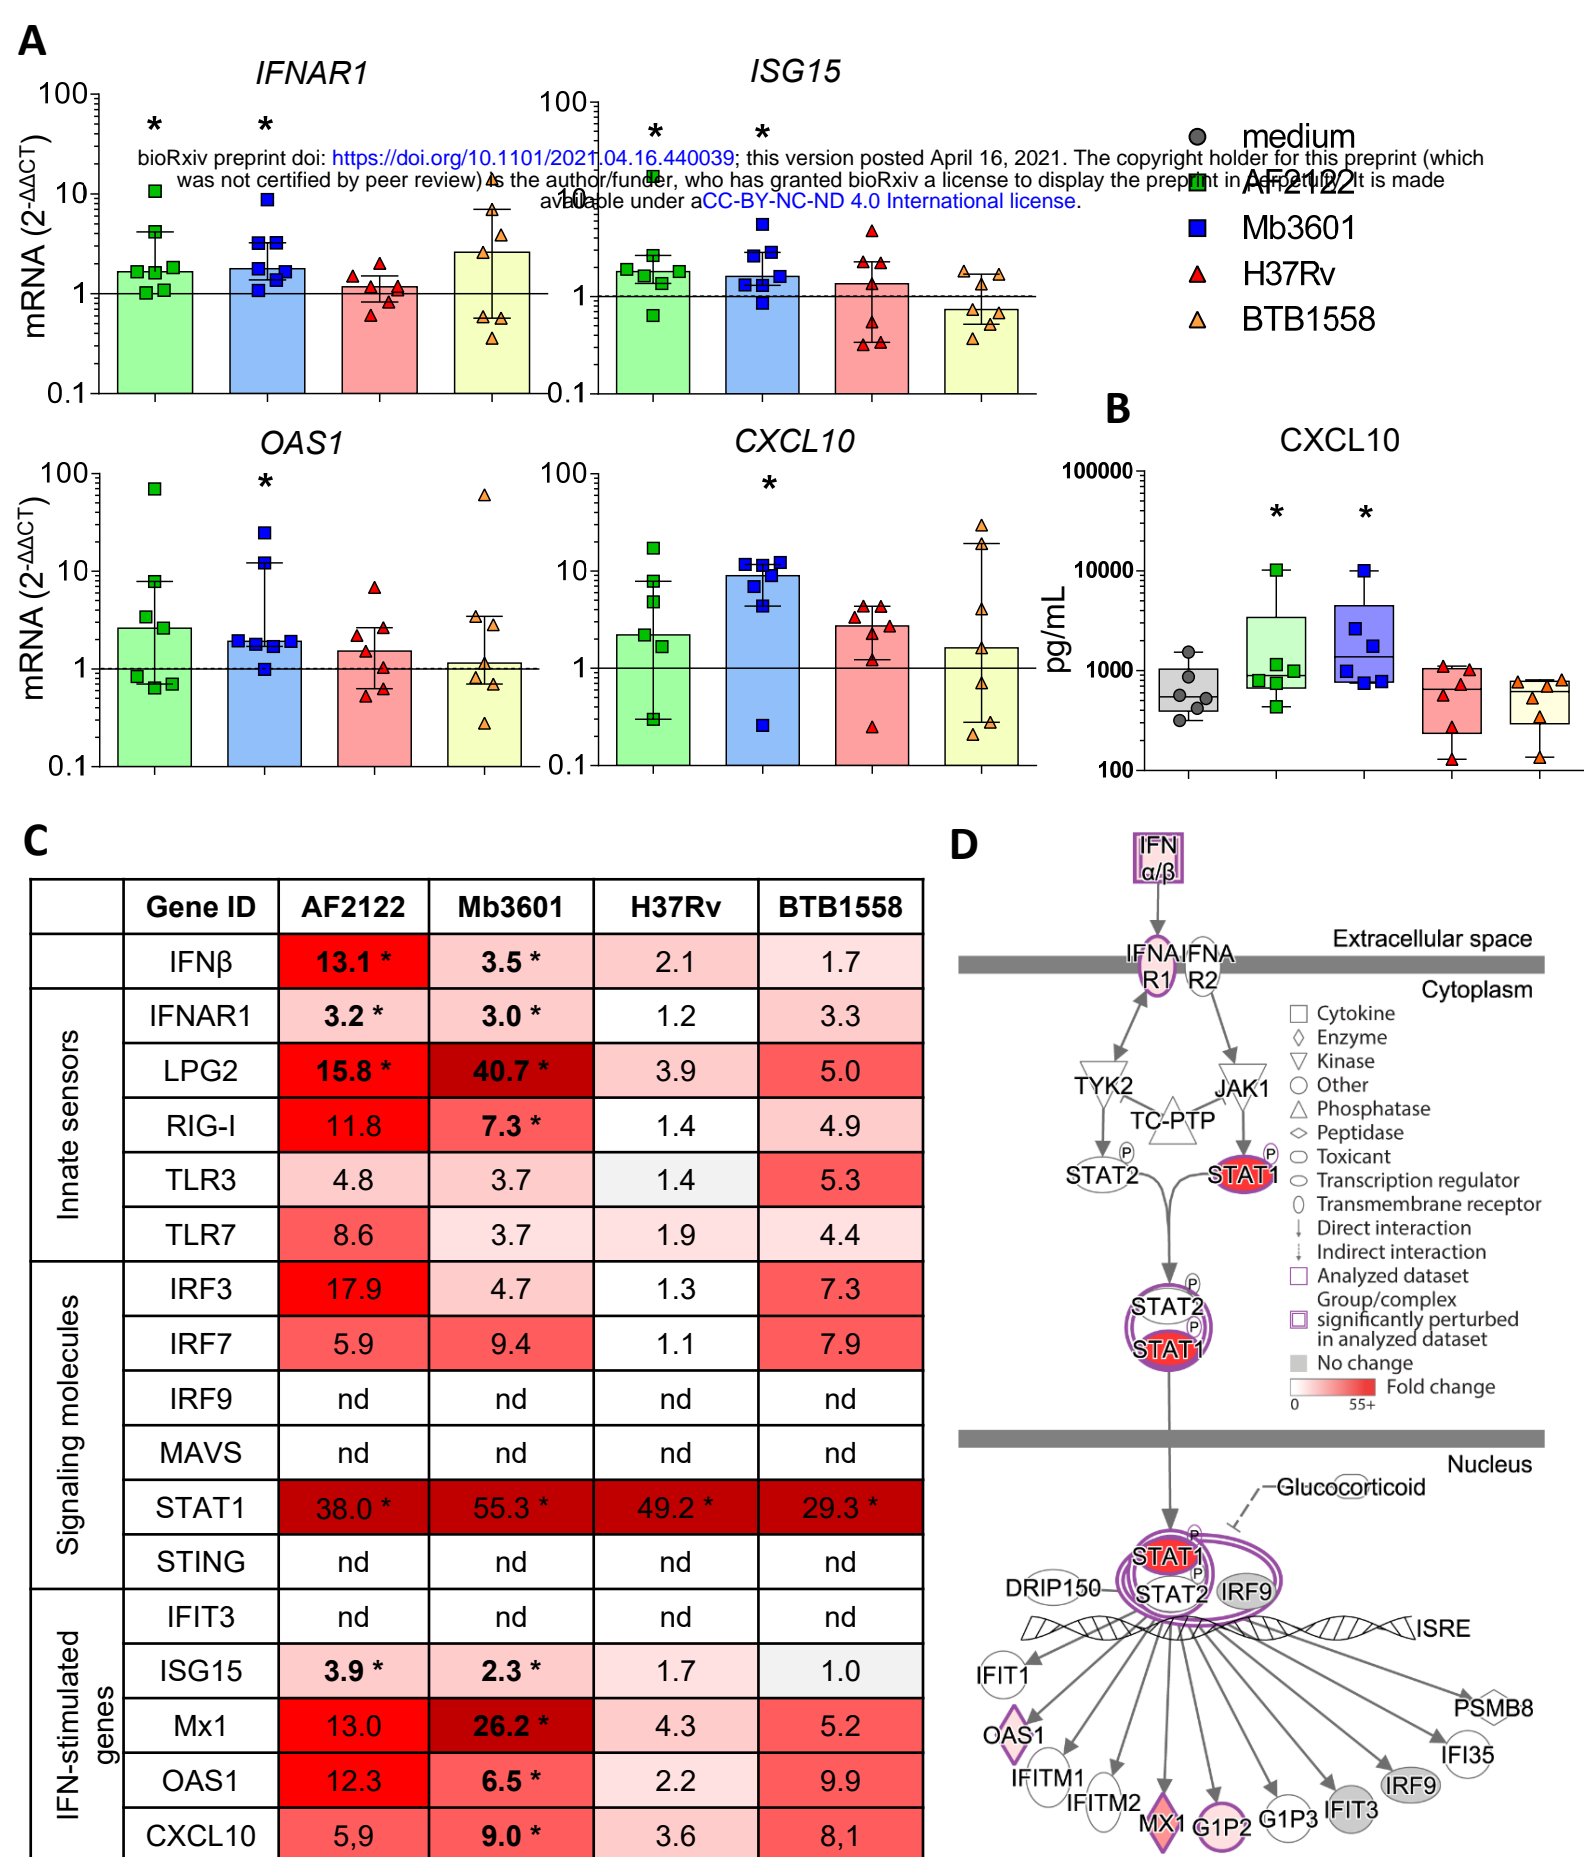

**Figure 5: Mb but not Mtb infection in the lung tissue from Blonde d'Aquitaine cows induces the type I interferon pathway.**

PCLS were infected as described in Figure 1. **(A)** *IFNAR1*, *ISG15*, *CXCL10* and *OAS1* gene expression at 2 dpi. Individual data and the median and interquartile range in each group are presented (n=7) **(B)** *CXCL10* protein level was measured in PCLS supernatant at 2 dpi. Individual data and the median and interquartile range in each group are presented (n=6). **(C)** The table represents the mean of fold change ( $2^{-\Delta\Delta CT}$ ) for each group (n=7) of major genes involved in type I interferon pathway. Graduated red box coloring are for higher gene expression and asterisks mark significant differences compared to uninfected PCLS. nd=not detected. **(D)** Ingenuity Pathway Analysis drawing of the Type I interferon pathway under IFNAR in the Mb3601 group. Graduated red box coloring are for higher gene expression. (A, B and C) \*  $p < 0.05$  (Wilcoxon non parametric test).

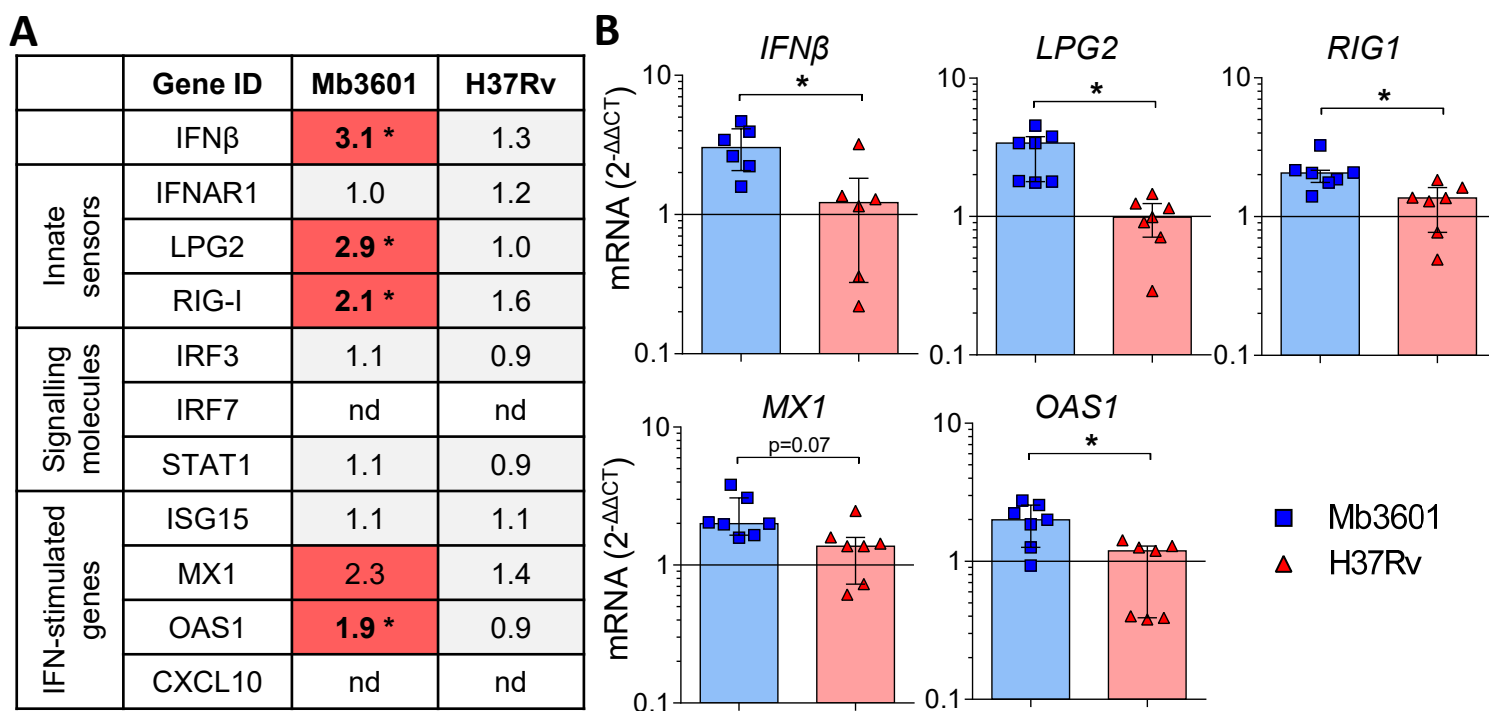

**Figure 6: Alveolar macrophages from Blonde d'Aquitaine contribute to the type I IFN signature in lung induced by Mb infection**

AMPs from Blonde d'Aquitaine lungs were infected with 10<sup>5</sup> cfu of Mb3601 or Mtb H37Rv. 6 h later mRNA was extracted from and expression of major genes from the type 1 IFN pathway was analyzed (**A**) Mean fold change (2<sup>-ddCT</sup>) of gene expression normalized to three house keeping genes was calculated in each group (n=7). Graduated red box coloring represents gene expression and asterisks mark significant differences compared to non infected controls (nd=not detected). (**B**) IFN $\beta$ , LPG2, RIG1, MX1 and OAS1 gene expression in AMPs was analysed by RT-qPCR at 6h post infection. Individual data and the median and interquartile range in each group are presented (n=7). (**A, B**) \*  $p < 0.05$  (Wilcoxon non parametric test).

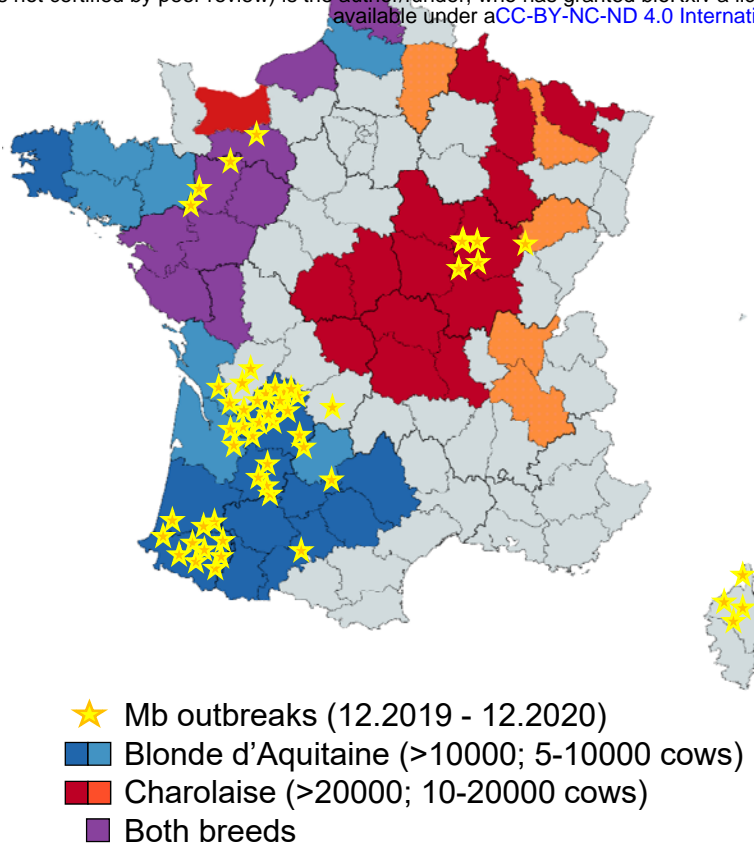

**Figure 7: Superposition of Blonde d'Aquitaine and Charolaise beef breeds in French counties where Mb outbreaks were declared between December 2019 and 2020.**

This map of France shows counties where Mb outbreaks were declared between December 2019 and December 2020 (yellow stars) and was obtained with data extracted from <https://www.plateforme-esa.fr/>. Herd densities of Blonde d'Aquitaine (blue), Charolaise (red) or both breeds (violet) were extracted from data obtained from <https://www.racesdefrance.fr> (cows above 3-years-old have been considered).
